# Supplementary material for: Vibsanoids A–D, four new subtypes of vibsane diterpenoids with a distinctive tricyclo[8.2.1.02,9]tridecane core fromViburnum odoratissimum
Source: Royal Society of Chemistry journal article supplement (doi:10.1039/d2qo00674j), 2022-01-01
Supplement: d2qo00674j1.pdf [file d2qo00674j1.pdf]

## Supporting Information

### **Vibsanoids A–D, four new subtype vibsane diterpenoids with a distinctive tricyclo[8.2.1.0<sup>2,9</sup>]tridecane core from *Viburnum odoratissimum***

Shi-Fang Li,<sup>a</sup> Tian-Ming Lv,<sup>a</sup> Ya-Ling Li,<sup>a</sup> Xiao-Qi Yu,<sup>a</sup> Guo-Dong Yao,<sup>a</sup> Bin Lin,<sup>b</sup>  
Xiao-Xiao Huang\*<sup>a</sup>, Shao-Jiang Song\*<sup>a</sup>

<sup>a</sup>*Key Laboratory of Computational Chemistry-Based Natural Antitumor Drug Research & Development, Liaoning Province; Engineering Research Center of Natural Medicine Active Molecule Research & Development, Liaoning Province; Key Laboratory of Natural Bioactive Compounds Discovery & Modification, Shenyang; School of Traditional Chinese Materia Medica, Shenyang Pharmaceutical University, Shenyang, Liaoning 110016, China;*

<sup>b</sup>*School of Pharmaceutical Engineering, Shenyang Pharmaceutical University, Shenyang 110016, P. R. China*

## Contents

- Table S1**  $^1\text{H}$  (600 Hz) and  $^{13}\text{C}$  (150 Hz) NMR data of compounds **1–4**.  
**Figure S1** Molecular network of the fractions from *V. odoratissimum*.  
**Figure S2** TIC of the fractions from the extract of *V. odoratissimum*.  
**Figure S3** MS/MS spectra of compounds **1–5**.  
**Figure S4** The structures of vibsatins A and B.  
**Table S2** The cytotoxic effects of compounds on HepG2, A549 and MCF-7 cells.  
**Table S3** Crystal data and structure refinement for **1**.  
**Table S4** Experimental and calculated  $^{13}\text{C}$  NMR data of compound **2** and its possible isomers **2a–2d**.  
**Table S5** The results of DP4+ analysis of compound **2**.  
**Figure S5** Liner correlation between calculated and experimental  $^{13}\text{C}$  NMR chemical shifts of compounds **3a–3b**.  
**Figure S6** Liner correlation between calculated and experimental  $^{13}\text{C}$  NMR chemical shifts of compounds **4a–4b**.  
**Table S6** Experimental and calculated  $^{13}\text{C}$  NMR data of compounds **3**, **4** and their possible isomers.  
**Table S7** The results of DP4+ analysis of compound **3**.  
**Table S8** The results of DP4+ analysis of compound **4**.  
**Figure S7–S10** The low-energy conformers of compound **2a–2d**.  
**Table S9–S12** Conformer analyses of compound **2a–2d**.  
**Figure S11–S12** The low-energy conformers of compound **3a–3b**.  
**Table S13–S14** Conformer analyses of compound **3a–3b**.  
**Figure S13–S14** The low-energy conformers of compound **4a–4b**.  
**Table S15–S16** Conformer analyses of compound **4a–4b**.  
**Figure S15** UV spectrum of compound **1**.  
**Figure S16** HRESIMS spectrum of compound **1**.  
**Figure S17**  $^1\text{H}$  NMR spectrum (600 MHz,  $\text{DMSO-}d_6$ ) of compound **1**.  
**Figure S18**  $^{13}\text{C}$  NMR spectrum (150 MHz,  $\text{DMSO-}d_6$ ) of compound **1**.  
**Figure S19** HSQC spectrum (600 MHz,  $\text{DMSO-}d_6$ ) of compound **1**.  
**Figure S20** HMBC spectrum (600 MHz,  $\text{DMSO-}d_6$ ) of compound **1**.  
**Figure S21**  $^1\text{H-}^1\text{H}$  COSY spectrum (600 MHz,  $\text{DMSO-}d_6$ ) of compound **1**.  
**Figure S22** NOESY spectrum (600 MHz,  $\text{DMSO-}d_6$ ) of compound **1**.  
**Figure S23** DEPT spectrum (600 MHz,  $\text{DMSO-}d_6$ ) of compound **1**.  
**Figure S24** UV spectrum of compound **2**.  
**Figure S25** HRESIMS spectrum of compound **2**.  
**Figure S26**  $^1\text{H}$  NMR spectrum (600 MHz,  $\text{DMSO-}d_6$ ) of compound **2**.  
**Figure S27**  $^{13}\text{C}$  NMR spectrum (150 MHz,  $\text{DMSO-}d_6$ ) of compound **2**.  
**Figure S28** HSQC spectrum (600 MHz,  $\text{DMSO-}d_6$ ) of compound **2**.  
**Figure S29** HMBC spectrum (600 MHz,  $\text{DMSO-}d_6$ ) of compound **2**.  
**Figure S30**  $^1\text{H-}^1\text{H}$  COSY spectrum (600 MHz,  $\text{DMSO-}d_6$ ) of compound **2**.  
**Figure S31** NOESY spectrum (600 MHz,  $\text{DMSO-}d_6$ ) of compound **2**.  
**Figure S32** DEPT spectrum (600 MHz,  $\text{DMSO-}d_6$ ) of compound **2**.

**Figure S33** UV spectrum of compound **3**.  
**Figure S34** HRESIMS spectrum of compound **3**.  
**Figure S35**  $^1\text{H}$  NMR spectrum (600 MHz,  $\text{CDCl}_3$ ) of compound **3**.  
**Figure S36**  $^{13}\text{C}$  NMR spectrum (150 MHz,  $\text{CDCl}_3$ ) of compound **3**.  
**Figure S37** HSQC spectrum (600 MHz,  $\text{CDCl}_3$ ) of compound **3**.  
**Figure S38** HMBC spectrum (600 MHz,  $\text{CDCl}_3$ ) of compound **3**.  
**Figure S39**  $^1\text{H}$ - $^1\text{H}$  COSY spectrum (600 MHz,  $\text{CDCl}_3$ ) of compound **3**.  
**Figure S40** NOESY spectrum (600 MHz,  $\text{CDCl}_3$ ) of compound **3**.  
**Figure S41** DEPT spectrum (600 MHz,  $\text{CDCl}_3$ ) of compound **3**.  
**Figure S42** UV spectrum of compound **4**.  
**Figure S43** UV spectrum of compound **4**.  
**Figure S44**  $^1\text{H}$  NMR spectrum (600 MHz,  $\text{CDCl}_3$ ) of compound **4**.  
**Figure S45**  $^{13}\text{C}$  NMR spectrum (150 MHz,  $\text{CDCl}_3$ ) of compound **4**.  
**Figure S46** HSQC spectrum (600 MHz,  $\text{CDCl}_3$ ) of compound **4**.  
**Figure S47** HMBC spectrum (600 MHz,  $\text{CDCl}_3$ ) of compound **4**.  
**Figure S48**  $^1\text{H}$ - $^1\text{H}$  COSY spectrum (600 MHz,  $\text{CDCl}_3$ ) of compound **4**.  
**Figure S49** NOESY spectrum (600 MHz,  $\text{CDCl}_3$ ) of compound **4**.  
**Figure S50** DEPT spectrum (600 MHz,  $\text{CDCl}_3$ ) of compound **4**.

**Table S1**  $^1\text{H}$  (600 Hz) and  $^{13}\text{C}$  (150 Hz) NMR data of compounds **1–4**.

| No. | <b>1<sup>a</sup></b>                         |                     | <b>2<sup>a</sup></b>                         |                     | <b>3<sup>b</sup></b>                         |                     | <b>4<sup>b</sup></b>                         |                     |
|-----|----------------------------------------------|---------------------|----------------------------------------------|---------------------|----------------------------------------------|---------------------|----------------------------------------------|---------------------|
|     | $\delta_{\text{H}}$ , mult ( <i>J</i> in Hz) | $\delta_{\text{C}}$ | $\delta_{\text{H}}$ , mult ( <i>J</i> in Hz) | $\delta_{\text{C}}$ | $\delta_{\text{H}}$ , mult ( <i>J</i> in Hz) | $\delta_{\text{C}}$ | $\delta_{\text{H}}$ , mult ( <i>J</i> in Hz) | $\delta_{\text{C}}$ |
| 1   | $\alpha$ 0.88, m                             | 42.3                | $\alpha$ 1.18, o.                            | 44.5                | $\alpha$ 1.14, dd (10.0, 1.5)                | 45.2                | $\alpha$ 1.12, o.                            | 43.2                |
|     | $\beta$ 1.54, dd (9.4, 2.4)                  |                     | $\beta$ 1.46, dd (9.3, 1.7)                  |                     | $\beta$ 1.21, m                              |                     | $\beta$ 1.59, dd (10.8, 2.5)                 |                     |
| 2   | 2.81, m                                      | 39.6                | 1.78, o.                                     | 45.4                | 2.45, m                                      | 42.0                | 1.80, o.                                     | 41.1                |
| 3   | -                                            | 53.7                | -                                            | 44.9                | -                                            | 56.0                | -                                            | 54.2                |
| 4   | -                                            | 95.8                | $\alpha$ 1.80, o.                            | 30.3                | -                                            | 113.3               | 4.93, dd (9.4, 3.4)                          | 75.3                |
|     | -                                            |                     | $\beta$ 1.25, o.                             |                     | -                                            |                     |                                              |                     |
| 5   | $\alpha$ 2.90, dd (15.4, 2.0)                | 36.9                | $\alpha$ 1.31, o.                            | 25.2                | 6.24, d (5.8)                                | 134.2               | 2.79, o.                                     | 39.6                |
|     | $\beta$ 1.85, dd (15.4, 1.9)                 |                     | $\beta$ 2.08, m                              |                     | -                                            |                     | 2.79, o.                                     |                     |
| 6   | 3.15, o.                                     | 58.7                | 2.85, dd (9.6, 5.2)                          | 62.1                | 6.07, d (5.8)                                | 135.7               | -                                            | 216.2               |
| 7   | -                                            | 54.8                | -                                            | 59.8                | -                                            | 88.9                | -                                            | 81.8                |
| 8   | 4.31, d (7.6)                                | 70.6                | 4.72, dd (11.2, 6.3)                         | 74.5                | 5.27, dd (11.6, 4.1)                         | 75.1                | 4.68, dd (12.2, 2.7)                         | 74.6                |
| 9   | 4.72, t (7.6)                                | 69.4                | $\alpha$ 1.61, td (13.5, 6.3)                | 24.3                | $\alpha$ 1.84, o.                            | 27.4                | $\alpha$ 1.78, o.                            | 34.0                |
|     |                                              |                     | $\beta$ 1.16, o.                             |                     | $\beta$ 1.52, o.                             |                     | $\beta$ 1.27, m                              |                     |
| 10  | 1.23, o.                                     | 52.9                | 1.32, o.                                     | 50.9                | 0.86, m                                      | 50.7                | 1.15, o.                                     | 50.1                |
| 11  | -                                            | 47.7                | -                                            | 47.5                | -                                            | 48.0                | -                                            | 46.5                |
| 12  | $\alpha$ 1.20, o.                            | 36.3                | 1.37, m                                      | 27.7                | $\alpha$ 1.85, o.                            | 32.0                | $\alpha$ 1.33, m                             | 37.6                |
|     | $\beta$ 1.32, o.                             |                     | 1.75, o.                                     |                     | $\beta$ 1.32, m                              |                     | $\beta$ 1.48, td (12.2, 2.3)                 |                     |
| 13  | $\alpha$ 1.69, m                             | 27.8                | 1.06, m                                      | 27.4                | $\alpha$ 2.24, m                             | 28.1                | $\alpha$ 1.79, o.                            | 27.7                |
|     | $\beta$ 1.32, o.                             |                     | 1.25, o.                                     |                     | $\beta$ 1.52, o.                             |                     | $\beta$ 1.54, m                              |                     |
| 18  | 3.85, dd (11.5, 5.3)                         | 65.8                | 3.40, dd (11.1, 4.5)                         | 58.0                | 3.43, d (10.7)                               | 67.9                | 3.42, d (10.7)                               | 66.5                |
|     | 3.17, o.                                     |                     | 3.60, dd (11.1, 4.5)                         |                     | 3.37, d (10.7)                               |                     | 4.05, d (10.7)                               |                     |
| 19  | 1.13, s                                      | 22.5                | 1.17, s                                      | 15.7                | 1.38, s                                      | 23.2                | 1.22, s                                      | 19.0                |
| 20  | 0.89, s                                      | 18.0                | 1.00, s                                      | 19.8                | 1.12, s                                      | 20.4                | 0.98, s                                      | 19.0                |

|       |                     |       |               |       |               |       |               |       |
|-------|---------------------|-------|---------------|-------|---------------|-------|---------------|-------|
| 1'    | -                   | 165.5 | -             | 165.1 | -             | 165.6 | -             | 165.4 |
| 2'    | 5.71, d (1.4)       | 115.1 | 5.72, d (1.3) | 115.4 | 5.61, d (1.3) | 116.0 | 5.70, d (1.3) | 115.6 |
| 3'    | -                   | 158.2 | -             | 157.7 | -             | 157.6 | -             | 158.4 |
| 4'    | 2.12, d (1.4)       | 20.0  | 2.12, d (1.3) | 20.0  | 2.16, d (1.3) | 20.6  | 2.16, d (1.3) | 20.5  |
| 5'    | 1.89, d (1.4)       | 27.0  | 1.89, d (1.3) | 26.9  | 1.89, d (1.3) | 27.6  | 1.89, d (1.3) | 27.6  |
| 4-OH  | 5.64, s             | -     | -             | -     | -             | -     | -             | -     |
| 18-OH | 4.05, dd (5.3, 3.3) | -     | 4.33, t (4.5) | -     | -             | -     | -             | -     |

a: measured in DMSO-*d*<sub>6</sub>.

b: measured in CDCl<sub>3</sub>.

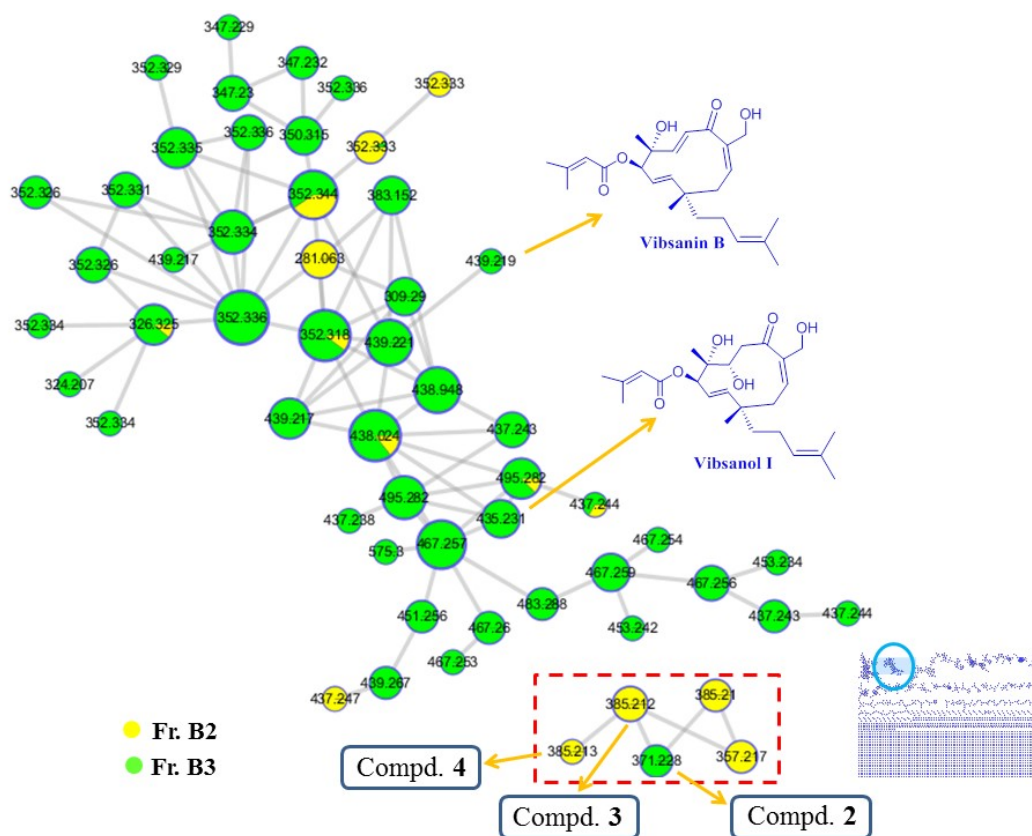

**Figure S1** Molecular network of the fractions from *V. odoratissimum*. Node sizes are based on the degree of correlation between compounds. And the nodes with novel skeleton were highlighted using the red frame.

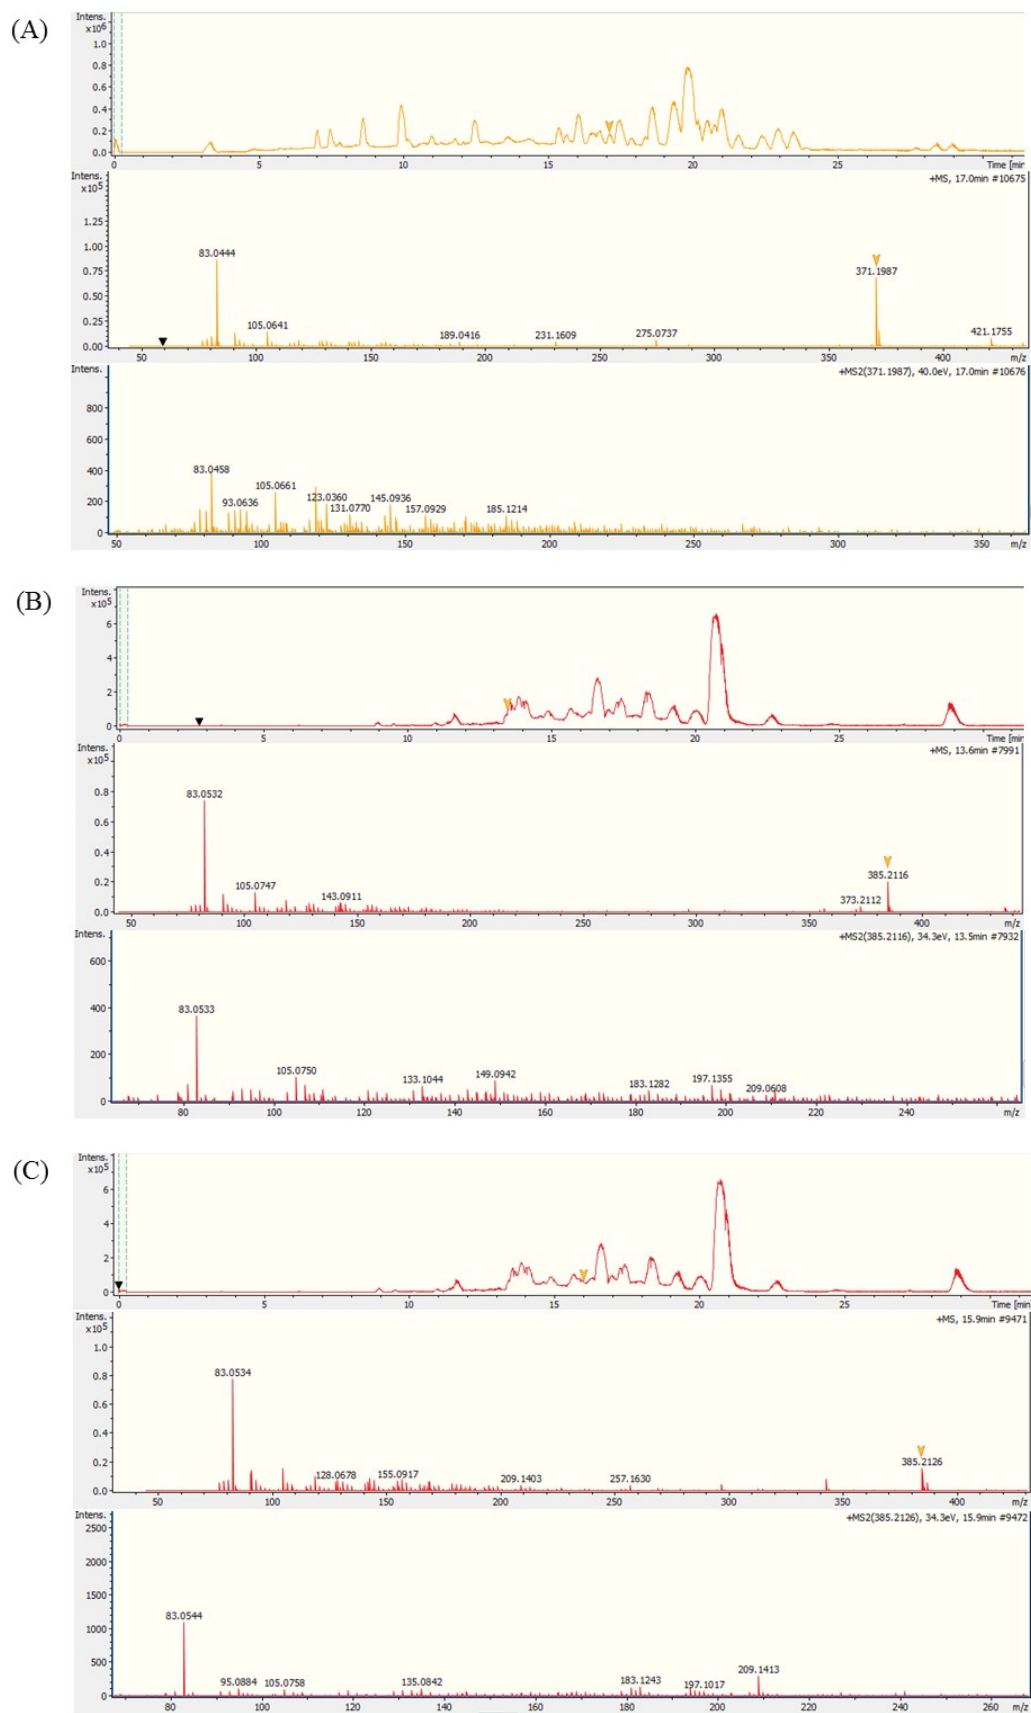

**Figure S2** TIC of the fractions from the extract of *V. odoratissimum* and the corresponding MS/MS spectra of compounds **2-4** (A-C).

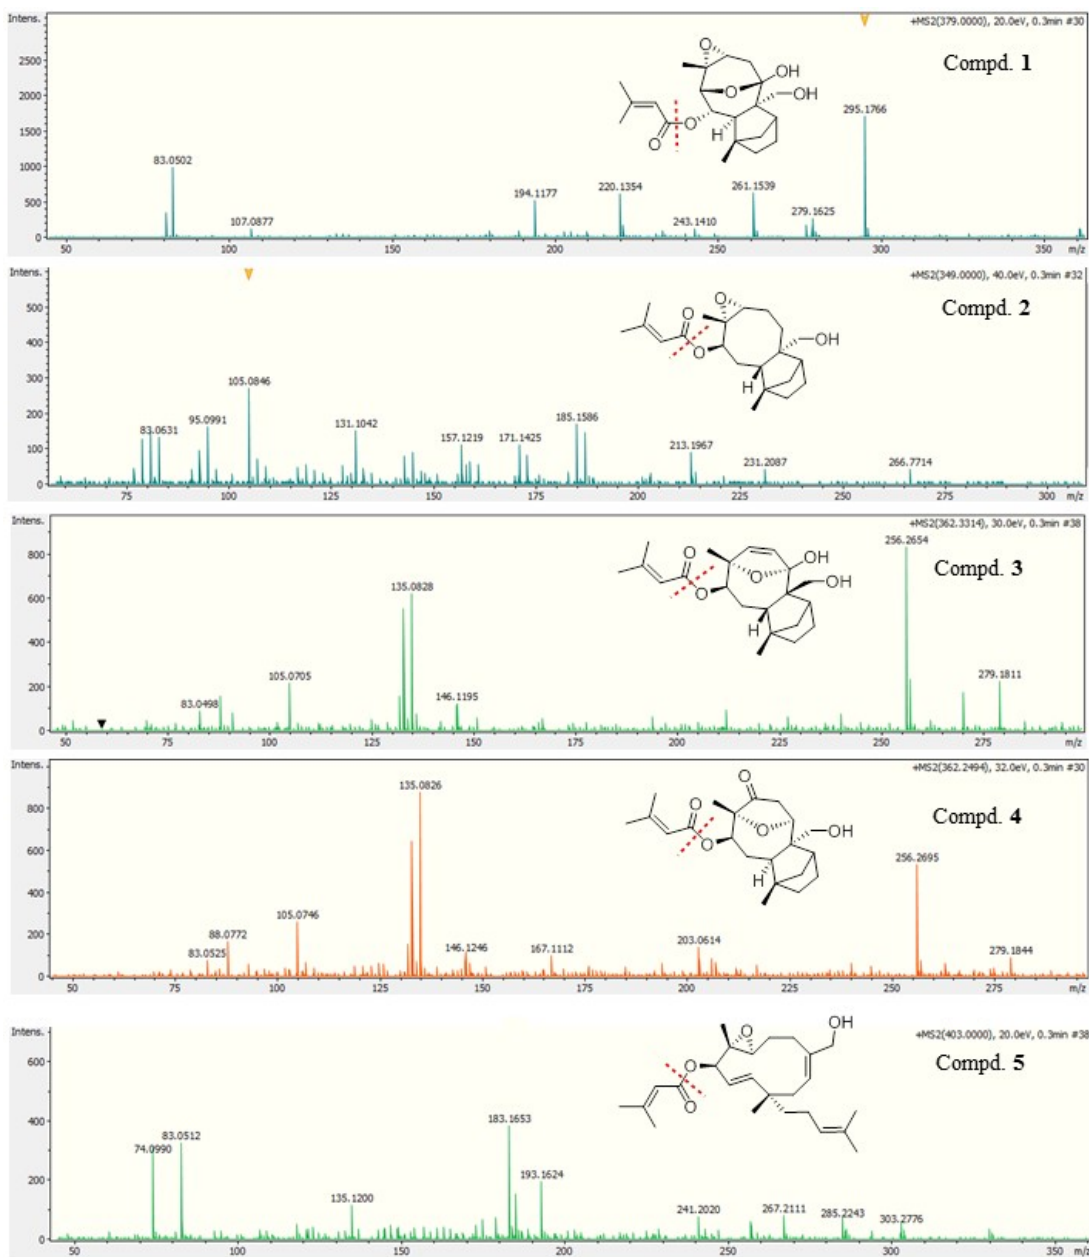

Figure S3 MS/MS spectra of compounds 1-5.

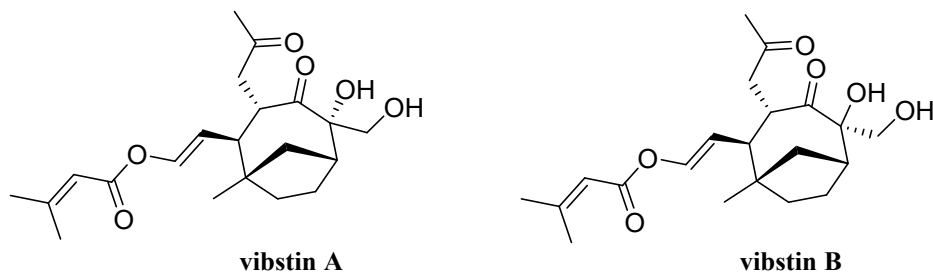

Figure S4 The structures of vibstins A and B.



**Table S2** The cytotoxic effects of compounds on A549, HepG2 and MCF-7 cells ( $IC_{50}$ ,  $\mu M$ )

| Compound               | A549              | HepG2           | MCF-7            |
|------------------------|-------------------|-----------------|------------------|
| <b>1</b>               | >50               | >50             | >50              |
| <b>2</b>               | >50               | >50             | >50              |
| <b>3</b>               | >50               | >50             | >50              |
| <b>4</b>               | >50               | >50             | >50              |
| <b>5</b>               | $29.10 \pm 1.02$  | $9.82 \pm 0.12$ | $34.88 \pm 0.67$ |
| Taxol <sup>a</sup>     | $0.024 \pm 0.001$ | -               | -                |
| Sorafenib <sup>a</sup> | -                 | $6.49 \pm 0.24$ | -                |
| Tamoxifen <sup>a</sup> | -                 | -               | $15.65 \pm 0.53$ |

<sup>a</sup> Positive control.

**Table S3** Crystal data and structure refinement for **1**.

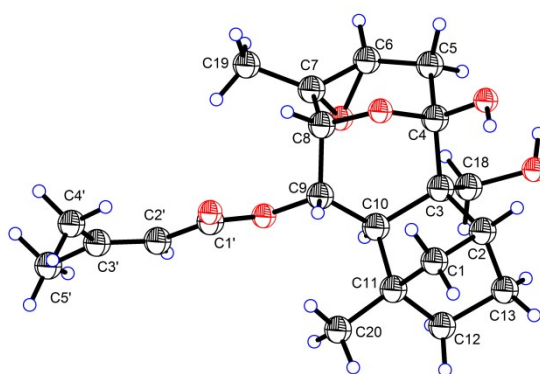

---

|                                                       |                                                             |
|-------------------------------------------------------|-------------------------------------------------------------|
| Empirical formula                                     | C <sub>21</sub> H <sub>30</sub> O <sub>6</sub>              |
| Formula weight                                        | 378.45                                                      |
| Temperature                                           | 153(2) K                                                    |
| Crystal system                                        | monoclinic                                                  |
| Space group                                           | P 1 21 1                                                    |
| <i>a</i> /Å                                           | 6.8059(6)                                                   |
| <i>b</i> /Å                                           | 11.1722(9)                                                  |
| <i>c</i> /Å                                           | 12.3471(11)                                                 |
| $\alpha$ /°                                           | 90                                                          |
| $\beta$ /°                                            | 95.962(5)                                                   |
| $\gamma$ /°                                           | 90                                                          |
| Volume/Å <sup>3</sup>                                 | 933.76(14)                                                  |
| <i>Z</i>                                              | 2                                                           |
| $\rho_{\text{calc}}/\text{cm}^3$                      | 1.346                                                       |
| $\mu/\text{mm}^{-1}$                                  | 0.799                                                       |
| F(000)                                                | 408                                                         |
| Crystal size/mm <sup>3</sup>                          | 0.15 × 0.15 × 0.1                                           |
| Radiation                                             | Cu K $\alpha$ ( $\lambda$ = 1.54178)                        |
| Theta range for data collection/°                     | 3.60 to 67.49                                               |
| Index ranges                                          | -8 ≤ <i>h</i> ≤ 8, -13 ≤ <i>k</i> ≤ 13, -14 ≤ <i>l</i> ≤ 14 |
| Reflections collected                                 | 13150                                                       |
| Independent reflections                               | 3263 [R(int) = 0.1556]                                      |
| Data/restraints/parameters                            | 3263/1/250                                                  |
| Goodness-of-fit on F <sup>2</sup>                     | 1.103                                                       |
| Final R indexes [ <i>I</i> > 2 $\sigma$ ( <i>I</i> )] | R <sub>1</sub> = 0.0671, wR <sub>2</sub> = 0.1715           |
| Final R indexes [all data]                            | R <sub>1</sub> = 0.1008, wR <sub>2</sub> = 0.1953           |
| Largest diff. peak/hole/e Å <sup>3</sup>              | 0.486/-0.475                                                |
| Absolute structure parameter                          | 0.3(3)                                                      |

---

**Table S4** Experimental and calculated  $^{13}\text{C}$  NMR data of compound **2** and its possible isomers **2a-2d** (ppm)

| No. | <b>2 (Exp.)</b> | <b>Calcd.</b> |           |           |           |
|-----|-----------------|---------------|-----------|-----------|-----------|
|     |                 | <b>2a</b>     | <b>2b</b> | <b>2c</b> | <b>2d</b> |
| 1   | 44.5            | 47.8          | 44.6      | 46.6      | 44.2      |
| 2   | 45.4            | 50.5          | 47.2      | 50.4      | 53.9      |
| 3   | 44.9            | 51.6          | 54.9      | 50.7      | 56.7      |
| 4   | 30.3            | 33.3          | 26.8      | 30.1      | 29.6      |
| 5   | 25.2            | 29.4          | 31.7      | 28.3      | 27.5      |
| 6   | 62.1            | 66.9          | 68.7      | 67.9      | 66.2      |
| 7   | 59.8            | 64.6          | 65.3      | 64.9      | 65.4      |
| 8   | 74.5            | 79.6          | 83.9      | 79.0      | 81.6      |
| 9   | 24.3            | 27.6          | 31.8      | 28.1      | 39.4      |
| 10  | 50.9            | 54.4          | 53.4      | 49.1      | 54.9      |
| 11  | 47.5            | 53.5          | 51.9      | 54.2      | 52.7      |
| 12  | 27.7            | 31.2          | 44.1      | 31.8      | 41.7      |
| 13  | 27.4            | 31.5          | 27        | 27.3      | 29.2      |
| 18  | 58.0            | 64.4          | 67.2      | 71.3      | 69.1      |
| 19  | 15.7            | 18.1          | 19.5      | 22.1      | 18.3      |
| 20  | 19.8            | 21.4          | 20.9      | 22.1      | 20.8      |
| 1'  | 165.1           | 175.6         | 174.8     | 174.7     | 175.5     |
| 2'  | 115.4           | 120.6         | 120.9     | 120.6     | 120.7     |
| 3'  | 157.7           | 176.3         | 176.1     | 176.5     | 176.2     |
| 4'  | 20.0            | 21.3          | 21.3      | 21.2      | 21.3      |
| 5'  | 26.9            | 30.5          | 30.4      | 30.4      | 30.5      |

**Table S5** The results of DP4+ analysis of compound **2**.

| A                | B        | C        | D            | E        | F               | G        | H |
|------------------|----------|----------|--------------|----------|-----------------|----------|---|
| Functional       | Solvent? |          | Basis Set    |          | Type of Data    |          |   |
| mPW1PW91         | PCII     |          | 6-311+G(d,p) |          | Unscaled Shifts |          |   |
|                  | Isomer 1 | Isomer 2 | Isomer 3     | Isomer 4 | Isomer 5        | Isomer 6 |   |
| sDP4+ (H data)   | 99.74%   | 0.22%    | 0.04%        | 0.00%    | —               | —        |   |
| sDP4+ (C data)   | 100.00%  | 0.00%    | 0.00%        | 0.00%    | —               | —        |   |
| sDP4+ (all data) | 100.00%  | 0.00%    | 0.00%        | 0.00%    | —               | —        |   |
| uDP4+ (H data)   | 15.83%   | 84.14%   | 0.01%        | 0.02%    | —               | —        |   |
| uDP4+ (C data)   | 100.00%  | 0.00%    | 0.00%        | 0.00%    | —               | —        |   |
| uDP4+ (all data) | 100.00%  | 0.00%    | 0.00%        | 0.00%    | —               | —        |   |
| DP4+ (H data)    | 98.85%   | 1.15%    | 0.00%        | 0.00%    | —               | —        |   |
| DP4+ (C data)    | 100.00%  | 0.00%    | 0.00%        | 0.00%    | —               | —        |   |
| DP4+ (all data)  | 100.00%  | 0.00%    | 0.00%        | 0.00%    | —               | —        |   |

To further validate the relative configurations of C-10 and C-3 for the formation of new bond and confirm the deduced structures of compound **3** and **4**, <sup>13</sup>C NMR predictions with DFT method were also performed. The results were as following.

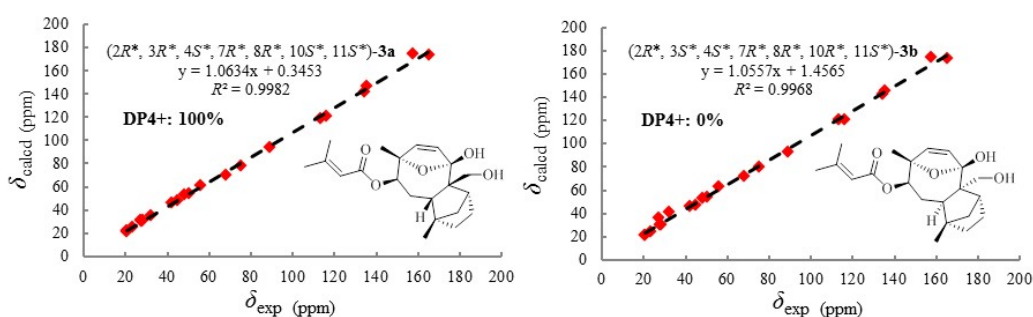

**Figure S5** Liner correlation and DP4+ probability analysis between calculated and experimental <sup>13</sup>C NMR chemical shifts of compounds **3a–3b**.

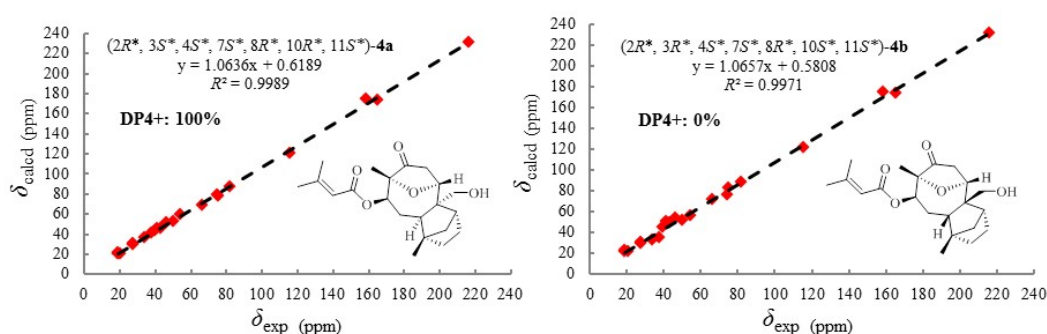

**Figure S6** Liner correlation and DP4+ probability analysis between calculated and experimental <sup>13</sup>C NMR chemical shifts of compounds **4a–4b**.

**Table S6** Experimental and calculated  $^{13}\text{C}$  NMR data of compounds **3**, **4** and their possible isomers (ppm)

| No. | <b>3 (Exp.)</b> | Calcd.    |           | <b>4 (Exp.)</b> | Calcd.    |           |
|-----|-----------------|-----------|-----------|-----------------|-----------|-----------|
|     |                 | <b>3a</b> | <b>3b</b> |                 | <b>4a</b> | <b>4b</b> |
| 1   | 45.2            | 47.8      | 47.3      | 43.2            | 45.9      | 49.4      |
| 2   | 42.0            | 46.1      | 45.9      | 41.1            | 45.8      | 50.7      |
| 3   | 56.0            | 60.8      | 63.0      | 54.2            | 59.7      | 56.3      |
| 4   | 113.3           | 119.2     | 120.2     | 75.3            | 78.6      | 82.5      |
| 5   | 134.2           | 141.7     | 142.3     | 39.6            | 44.2      | 44.4      |
| 6   | 135.7           | 146.5     | 145.2     | 216.2           | 231.1     | 231.2     |
| 7   | 88.9            | 94.2      | 93.2      | 81.8            | 86.9      | 87.7      |
| 8   | 75.1            | 78.2      | 79.6      | 74.6            | 79.1      | 76.2      |
| 9   | 27.4            | 30.8      | 36.2      | 34.0            | 36.6      | 32.8      |
| 10  | 50.7            | 54.3      | 53.9      | 50.1            | 52.9      | 52.1      |
| 11  | 48.0            | 53.0      | 52.8      | 46.5            | 51.7      | 53.6      |
| 12  | 32.0            | 34.7      | 40.9      | 37.6            | 40.9      | 34.7      |
| 13  | 28.1            | 31.3      | 30.3      | 27.7            | 31.5      | 29.8      |
| 18  | 67.9            | 70.0      | 71.8      | 66.5            | 68.9      | 71.8      |
| 19  | 23.2            | 24.9      | 24.2      | 19.0            | 21.8      | 22.6      |
| 20  | 20.4            | 22.1      | 20.9      | 19.0            | 20.7      | 22.2      |
| 1'  | 165.6           | 173.5     | 173.4     | 165.4           | 173.6     | 173.6     |
| 2'  | 116.0           | 121.0     | 121.0     | 115.6           | 121.1     | 121.4     |
| 3'  | 157.6           | 174.9     | 174.9     | 158.4           | 174.6     | 174.7     |
| 4'  | 20.6            | 21.1      | 21.1      | 20.5            | 21.2      | 21.2      |
| 5'  | 27.6            | 30.2      | 30.3      | 27.6            | 30.2      | 30.2      |

**Table S7** The results of DP4+ analysis of compound 3.

| Functional       | Solvent? |          | Basis Set    |          | Type of Data    |          |
|------------------|----------|----------|--------------|----------|-----------------|----------|
| mPW1PW91         | PCI      |          | 6-311+G(d,p) |          | Unscaled Shifts |          |
|                  | Isomer 1 | Isomer 2 | Isomer 3     | Isomer 4 | Isomer 5        | Isomer 6 |
| sDP4+ (H data)   | 00.00%   | 0.00%    | –            | –        | –               | –        |
| sDP4+ (C data)   | 99.99%   | 0.01%    | –            | –        | –               | –        |
| sDP4+ (all data) | 00.00%   | 0.00%    | –            | –        | –               | –        |
| uDP4+ (H data)   | 00.00%   | 0.00%    | –            | –        | –               | –        |
| uDP4+ (C data)   | 99.90%   | 0.10%    | –            | –        | –               | –        |
| uDP4+ (all data) | 00.00%   | 0.00%    | –            | –        | –               | –        |
| DP4+ (H data)    | 00.00%   | 0.00%    | –            | –        | –               | –        |
| DP4+ (C data)    | 00.00%   | 0.00%    | –            | –        | –               | –        |
| DP4+ (all data)  | 00.00%   | 0.00%    | –            | –        | –               | –        |

**Table S8** The results of DP4+ analysis of compound 4.

| Functional       | Solvent? |          | Basis Set    |          | Type of Data    |          |
|------------------|----------|----------|--------------|----------|-----------------|----------|
| mPW1PW91         | PCI      |          | 6-311+G(d,p) |          | Unscaled Shifts |          |
|                  | Isomer 1 | Isomer 2 | Isomer 3     | Isomer 4 | Isomer 5        | Isomer 6 |
| sDP4+ (H data)   | 00.00%   | 0.00%    | –            | –        | –               | –        |
| sDP4+ (C data)   | 00.00%   | 0.00%    | –            | –        | –               | –        |
| sDP4+ (all data) | 00.00%   | 0.00%    | –            | –        | –               | –        |
| uDP4+ (H data)   | 00.00%   | 0.00%    | –            | –        | –               | –        |
| uDP4+ (C data)   | 00.00%   | 0.00%    | –            | –        | –               | –        |
| uDP4+ (all data) | 00.00%   | 0.00%    | –            | –        | –               | –        |
| DP4+ (H data)    | 00.00%   | 0.00%    | –            | –        | –               | –        |
| DP4+ (C data)    | 00.00%   | 0.00%    | –            | –        | –               | –        |
| DP4+ (all data)  | 00.00%   | 0.00%    | –            | –        | –               | –        |

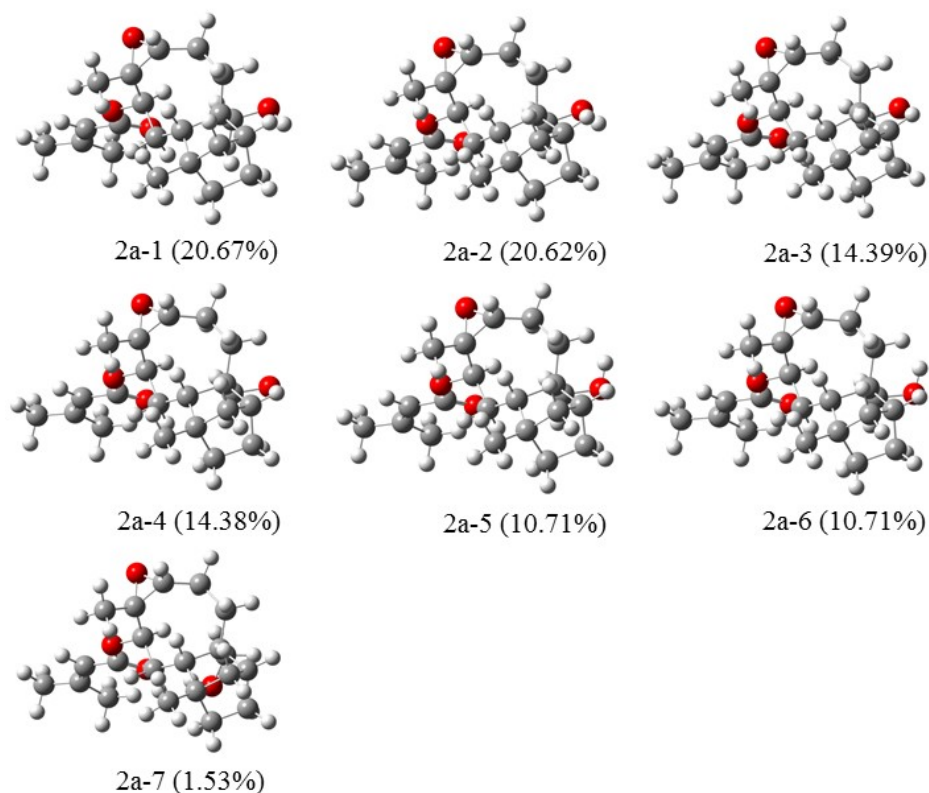

**Figure S7** The low-energy conformers of compound 2a.

**Table S9** Conformer analyses of compound **2a**.Gibbs free energy and Boltzmann distribution of compound **2a** (298.15 K)

| Conformations | G<br>(Hartree) | $\Delta G$ (Kcal/mol) | Boltzmann<br>distribution |
|---------------|----------------|-----------------------|---------------------------|
| 2a-1          | -1120.42245332 | 0                     | 20.67%                    |
| 2a-2          | -1120.42245100 | 0.00000232            | 20.62%                    |
| 2a-3          | -1120.42211148 | 0.00034184            | 14.39%                    |
| 2a-4          | -1120.41918408 | 0.00326924            | 14.38%                    |
| 2a-5          | -1120.42183289 | 0.00062043            | 10.71%                    |
| 2a-6          | -1120.42183264 | 0.00062068            | 10.71%                    |
| 2a-7          | -1120.41999222 | 0.00246110            | 1.53%                     |

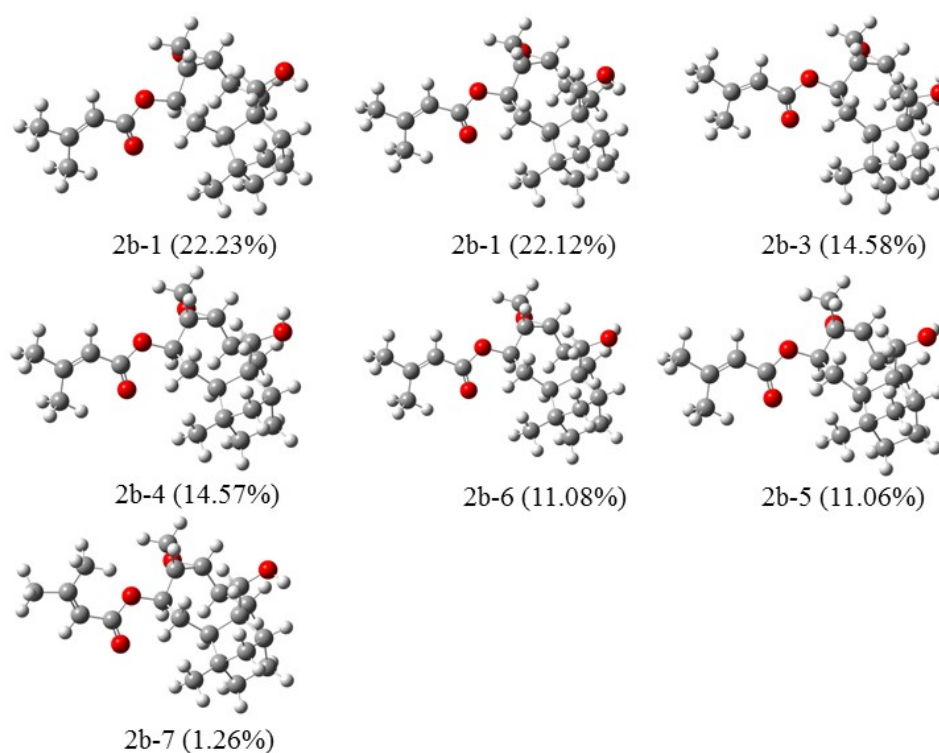**Figure S8** The low-energy conformers of compound **2b**.**Table S10** Conformer analyses of compound **2b**.Gibbs free energy and Boltzmann distribution of compound **2b** (298.15 K)

| Conformations | G<br>(Hartree) | $\Delta G$ (Kcal/mol) | Boltzmann<br>distribution |
|---------------|----------------|-----------------------|---------------------------|
| 2b-1          | -1120.41491463 | 0                     | 22.23%                    |
| 2b-2          | -1120.41490990 | 0.00000473            | 22.12%                    |

|      |                |            |        |
|------|----------------|------------|--------|
| 2b-3 | -1120.41451634 | 0.00039829 | 14.58% |
| 2b-4 | -1120.41451562 | 0.00039901 | 14.57% |
| 2b-5 | -1120.41425685 | 0.00065778 | 11.06% |
| 2b-6 | -1120.41425501 | 0.00065962 | 11.08% |
| 2b-7 | -1120.41220540 | 0.00270923 | 1.26%  |

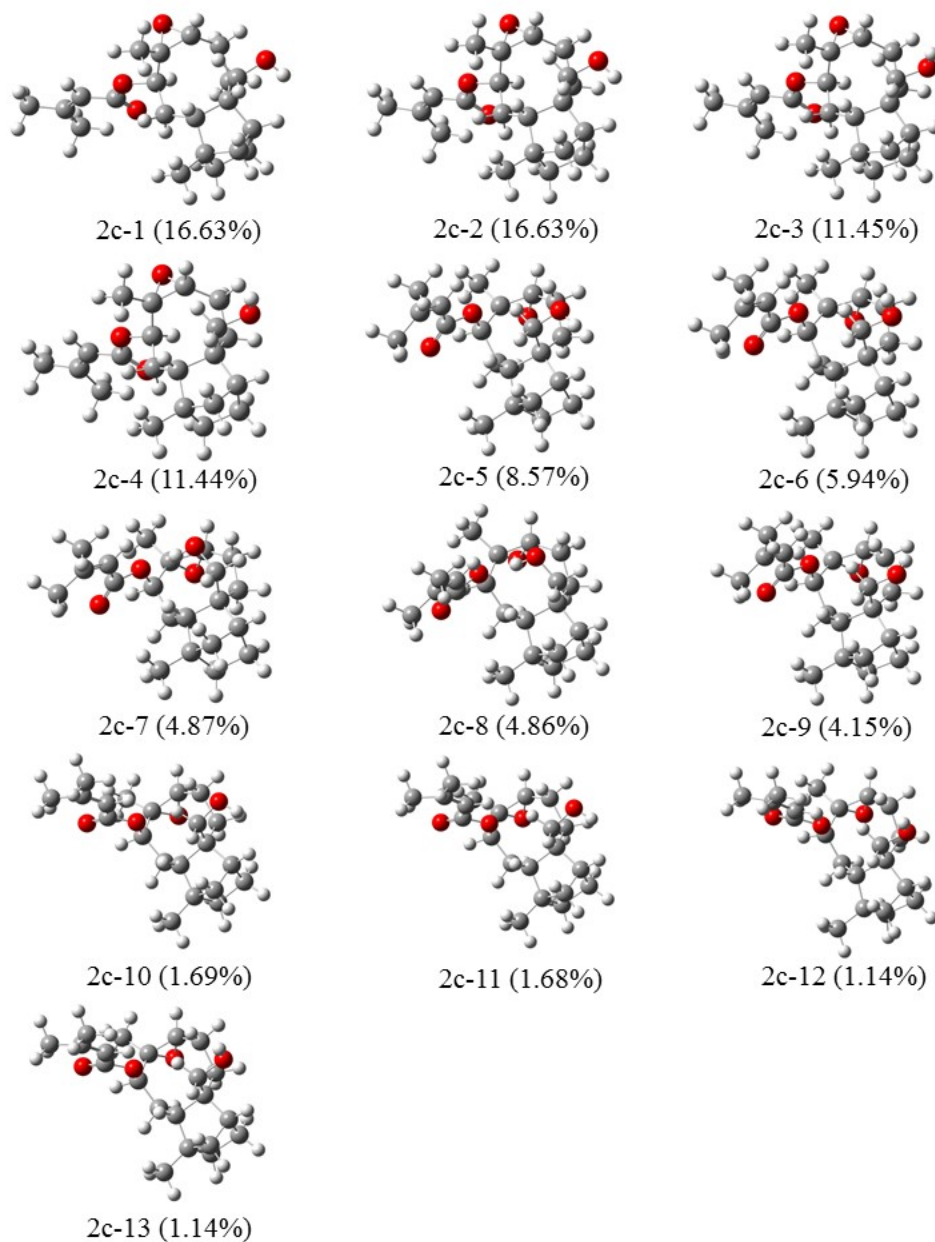

**Figure S9** The low-energy conformers of compound **2c**.

**Table S11** Conformer analyses of compound **2c**.

Gibbs free energy and Boltzmann distribution of compound **2c** (298.15 K)

| Conformations | G<br>(Hartree) | $\Delta G$ (Kcal/mol) | Boltzmann<br>distribution |
|---------------|----------------|-----------------------|---------------------------|
|---------------|----------------|-----------------------|---------------------------|



|       |                |            |        |
|-------|----------------|------------|--------|
| 2c-1  | -1120.41000748 | 0          | 16.63% |
| 2c-2  | -1120.41000716 | 0.00000032 | 16.63% |
| 2c-3  | -1120.40965448 | 0.00035300 | 11.45% |
| 2c-4  | -1120.40965365 | 0.00035383 | 11.44% |
| 2c-5  | -1120.40938118 | 0.00062630 | 8.57%  |
| 2c-6  | -1120.40903578 | 0.00097170 | 5.94%  |
| 2c-7  | -1120.40884746 | 0.00116002 | 4.87%  |
| 2c-8  | -1120.40884537 | 0.00116211 | 4.86%  |
| 2c-9  | -1120.40869773 | 0.00130975 | 4.15%  |
| 2c-10 | -1120.40784871 | 0.00215877 | 1.69%  |
| 2c-11 | -1120.40784555 | 0.00216193 | 1.68%  |
| 2c-12 | -1120.40747945 | 0.00252803 | 1.14%  |
| 2c-13 | -1120.40747789 | 0.00252959 | 1.14%  |

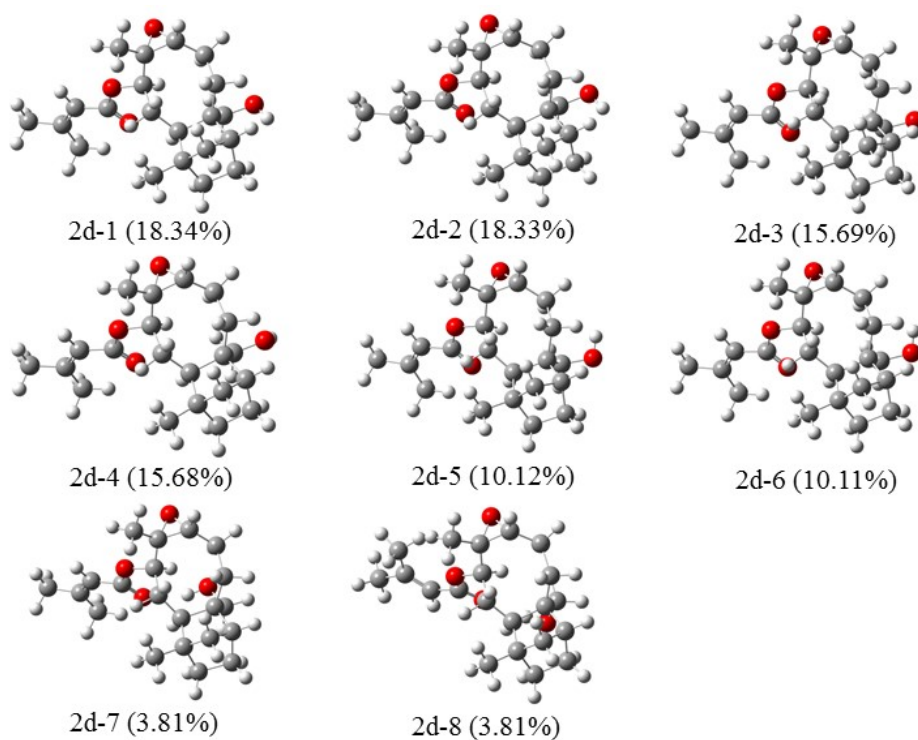

**Figure S10** The low-energy conformers of compound **2d**.

**Table S12** Conformer analyses of compound **2d**.

Gibbs free energy and Boltzmann distribution of compound **2d** (298.15 K)

| Conformations | G<br>(Hartree) | $\Delta G$ (Kcal/mol) | Boltzmann<br>distribution |
|---------------|----------------|-----------------------|---------------------------|
|---------------|----------------|-----------------------|---------------------------|

|      |                |            |        |
|------|----------------|------------|--------|
| 2d-1 | -1120.41450112 | 0          | 18.34% |
| 2d-2 | -1120.41450091 | 0.00000021 | 18.33% |
| 2d-3 | -1120.41435371 | 0.00014741 | 15.69% |
| 2d-4 | -1120.41435361 | 0.00014751 | 15.68% |
| 2d-5 | -1120.41393960 | 0.00056152 | 10.12% |
| 2d-6 | -1120.41393865 | 0.00056247 | 10.11% |
| 2d-7 | -1120.41301735 | 0.00148377 | 3.81%  |
| 2d-8 | -1120.41301730 | 0.00148382 | 3.81%  |

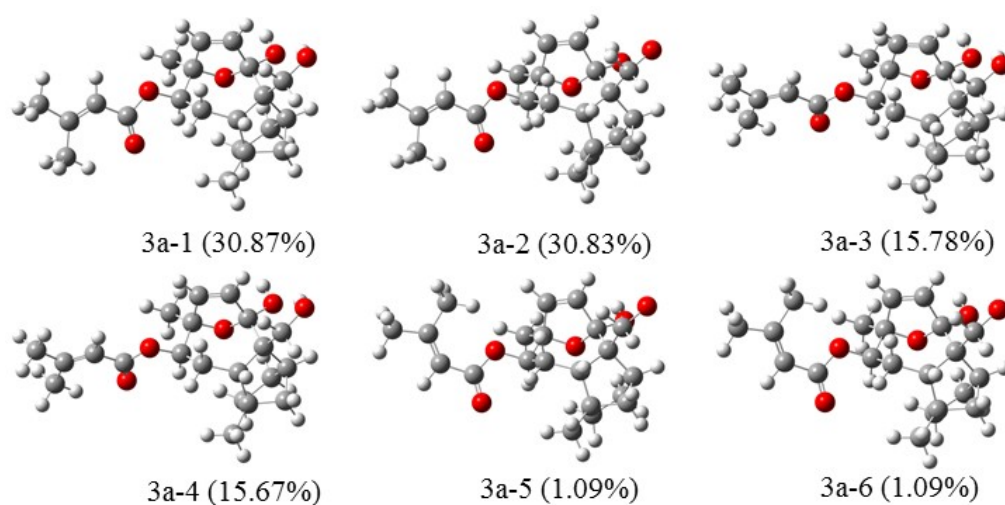

**Figure S11.** The low-energy conformers of compound **3a**.

**Table S13.** Conformer analyses of compound **3a**.

Gibbs free energy and Boltzmann distribution of compound **3a** (298.15 K)

| Conformations | G<br>(Hartree) | $\Delta G$ (Kcal/mol) | Boltzmann<br>distribution |
|---------------|----------------|-----------------------|---------------------------|
| 3a-1          | -1194.44992764 | 0                     | 30.87%                    |
| 3a-2          | -1194.44992654 | 0.00000110            | 30.83%                    |
| 3a-3          | -1194.44929441 | 0.00063323            | 15.78%                    |
| 3a-4          | -1194.44928768 | 0.00063996            | 15.67%                    |
| 3a-5          | -1194.44676696 | 0.00316068            | 1.09%                     |
| 3a-6          | -1194.44677170 | 0.00315594            | 1.09%                     |

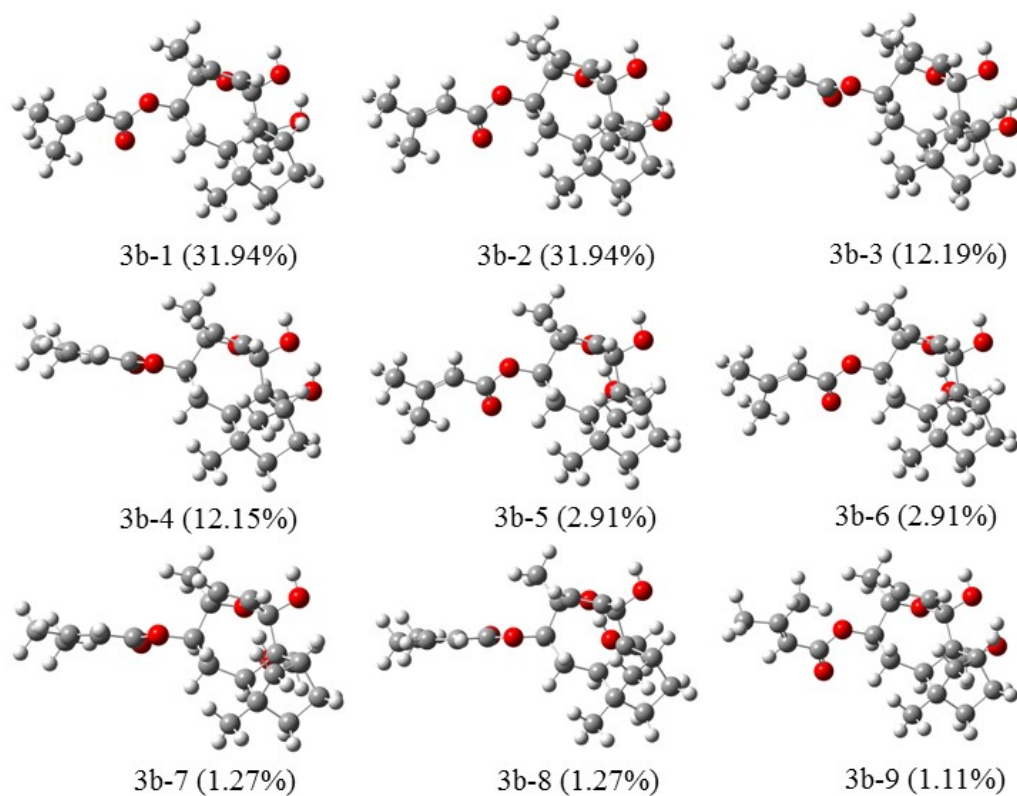

**Figure S12.** The low-energy conformers of compound **3b**.

**Table S14.** Conformer analyses of compound **3b**.

Gibbs free energy and Boltzmann distribution of compound **3b** (298.15 K)

| Conformations | G<br>(Hartree) | $\Delta G$ (Kcal/mol) | Boltzmann<br>distribution |
|---------------|----------------|-----------------------|---------------------------|
| 3b-1          | -1194.45135648 | 0                     | 31.94%                    |
| 3b-2          | -1194.45135643 | 0.00000005            | 31.94%                    |
| 3b-3          | -1194.45044680 | 0.00090968            | 12.19%                    |
| 3b-4          | -1194.45044359 | 0.00091289            | 12.15%                    |
| 3b-5          | -1194.44909516 | 0.00226132            | 2.91%                     |
| 3b-6          | -1194.44909586 | 0.00226062            | 2.91%                     |
| 3b-7          | -1194.44831428 | 0.00304220            | 1.27%                     |
| 3b-8          | -1194.44831243 | 0.00304405            | 1.27%                     |
| 3b-9          | -1194.44818252 | 0.00317396            | 1.11%                     |

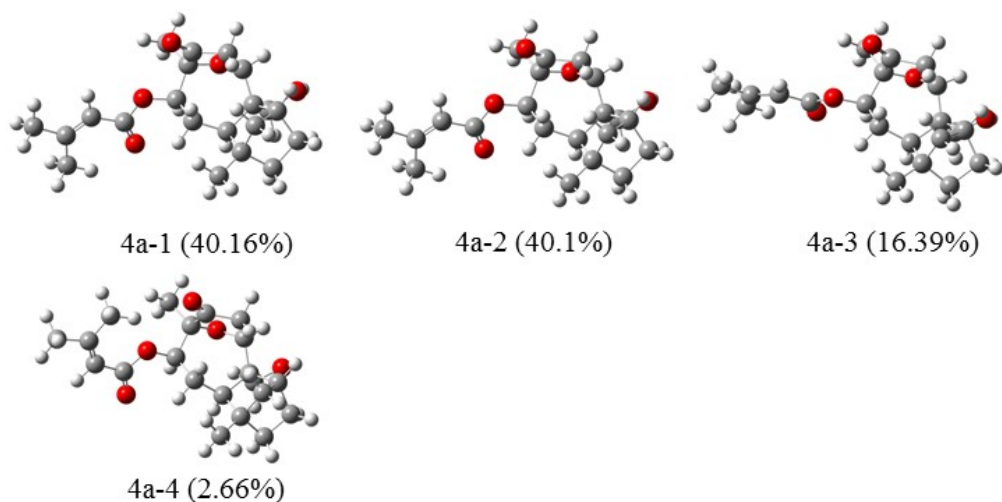

**Figure S13.** The low-energy conformers of compound **4a**.

**Table S15.** Conformer analyses of compound **4a**.

Gibbs free energy and Boltzmann distribution of compound **4a** (298.15 K)

| Conformations | G<br>(Hartree) | $\Delta G$ (Kcal/mol) | Boltzmann<br>distribution |
|---------------|----------------|-----------------------|---------------------------|
| 4a-1          | -1194.46260719 | 0                     | 40.16%                    |
| 4a-2          | -1194.46260568 | 0.00000151            | 40.1%                     |
| 4a-3          | -1194.46176122 | 0.00084597            | 16.39%                    |
| 4a-4          | -1194.46004390 | 0.00256329            | 2.66%                     |

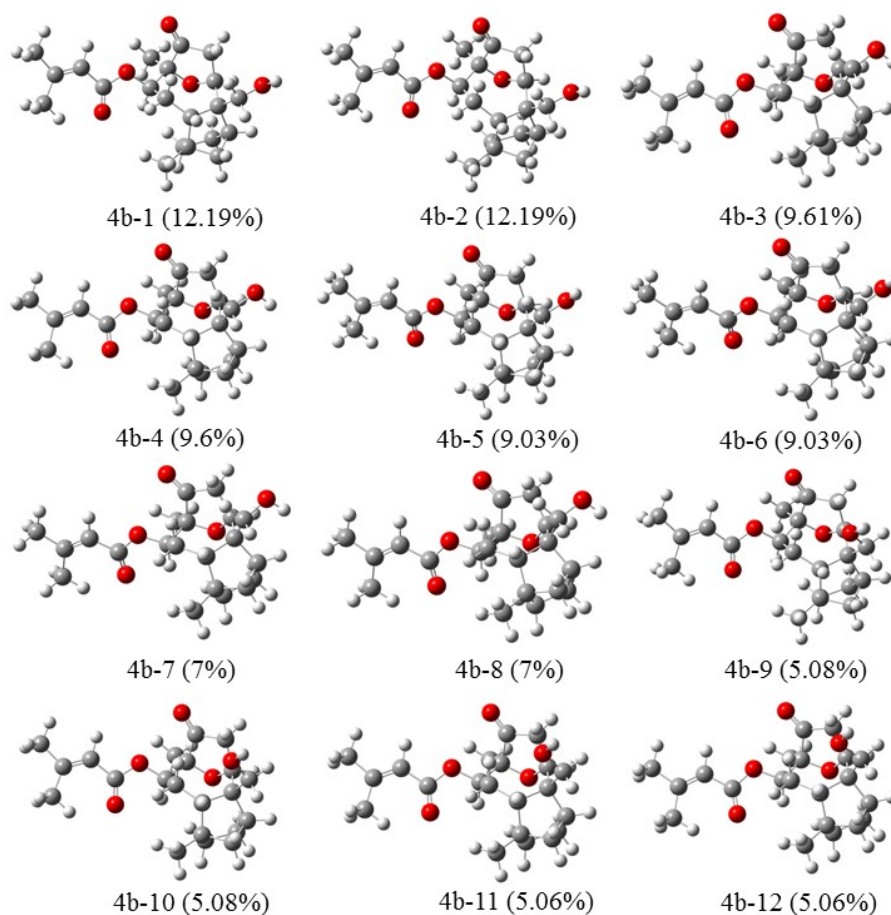

**Figure S14.** The low-energy conformers of compound **4b**.

**Table S16.** Conformer analyses of compound **4b**.

Gibbs free energy and Boltzmann distribution of compound **4b** (298.15 K)

| Conformations | G<br>(Hartree) | $\Delta G$ (Kcal/mol) | Boltzmann<br>distribution |
|---------------|----------------|-----------------------|---------------------------|
| 4b-1          | -1194.45937152 | 0                     | 12.19%                    |
| 4b-2          | -1194.45937131 | 0.00000021            | 12.19%                    |
| 4b-3          | -1194.45914701 | 0.00022451            | 9.61%                     |
| 4b-4          | -1194.45914660 | 0.00022492            | 9.6%                      |
| 4b-5          | -1194.45908834 | 0.00028318            | 9.03%                     |
| 4b-6          | -1194.45908777 | 0.00028375            | 9.03%                     |
| 4b-7          | -1194.45884753 | 0.00052399            | 7%                        |
| 4b-8          | -1194.45884703 | 0.00052449            | 7%                        |
| 4b-9          | -1194.45854452 | 0.00082700            | 5.08%                     |
| 4b-10         | -1194.45854426 | 0.00082726            | 5.08%                     |
| 4b-11         | -1194.45854227 | 0.00082925            | 5.06%                     |
| 4b-12         | -1194.45854168 | 0.00082984            | 5.06%                     |

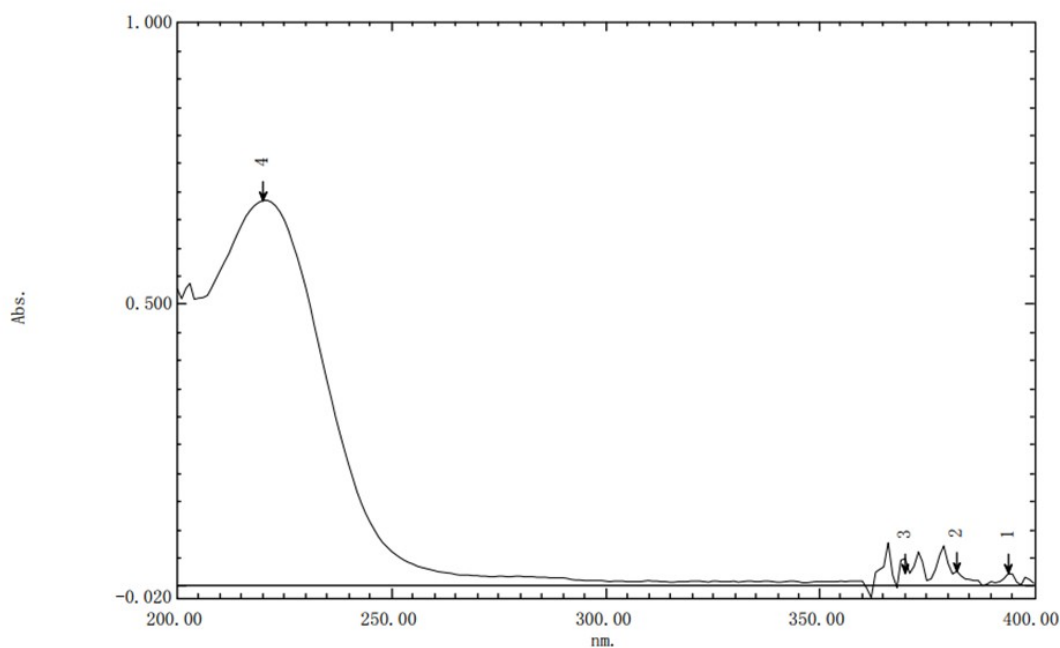

| No. | P/V | Wavelength | Abs. | 描述 |
|-----|-----|------------|------|----|
| 1   | ①   | 394.00     | .022 |    |
| 2   | ②   | 382.00     | .026 |    |
| 3   | ③   | 370.00     | .023 |    |
| 4   | ④   | 220.00     | .684 |    |

Figure S15 UV spectrum of compound 1.

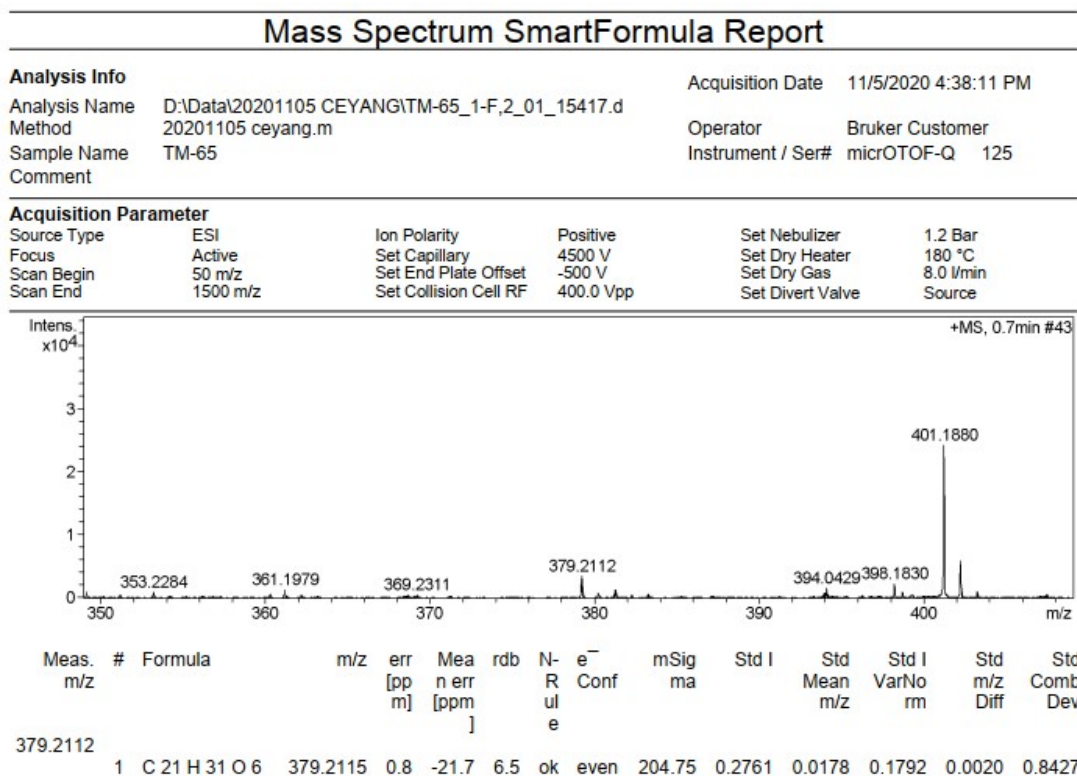

Figure S16 HRESIMS spectrum of compound 1.

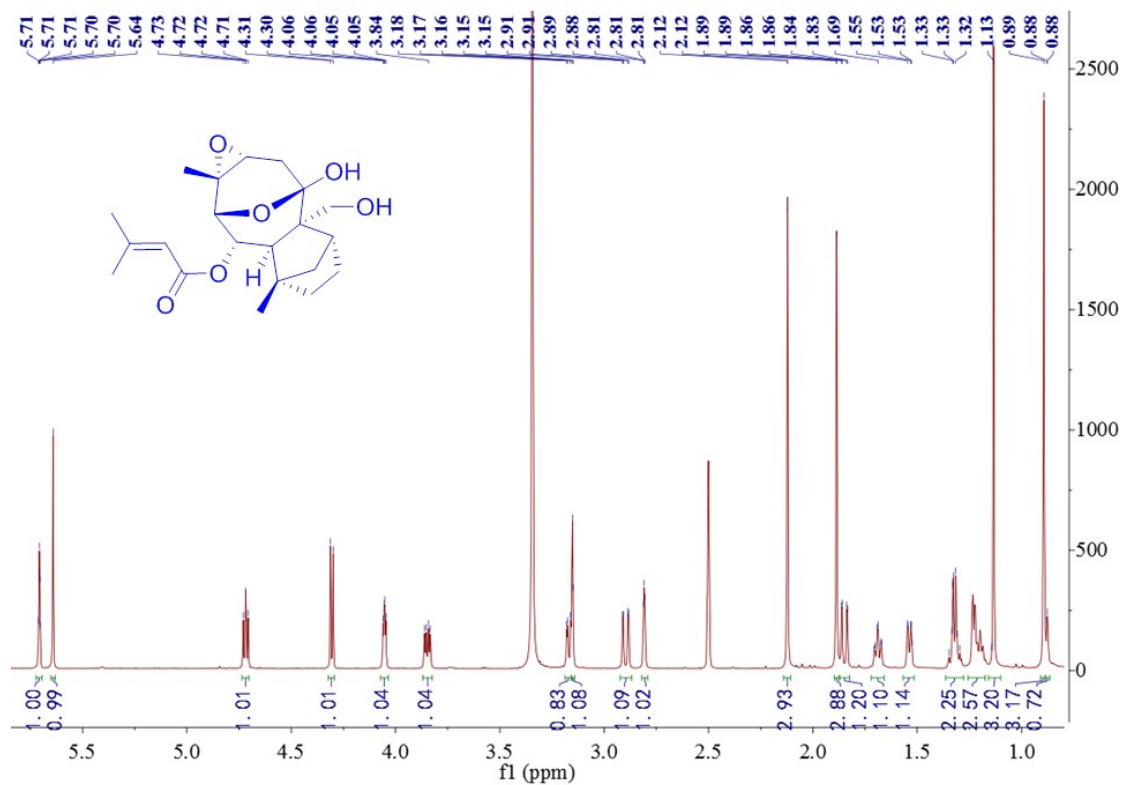

Figure S17  $^1\text{H}$  NMR spectrum (600 MHz,  $\text{DMSO-}d_6$ ) of compound 1.

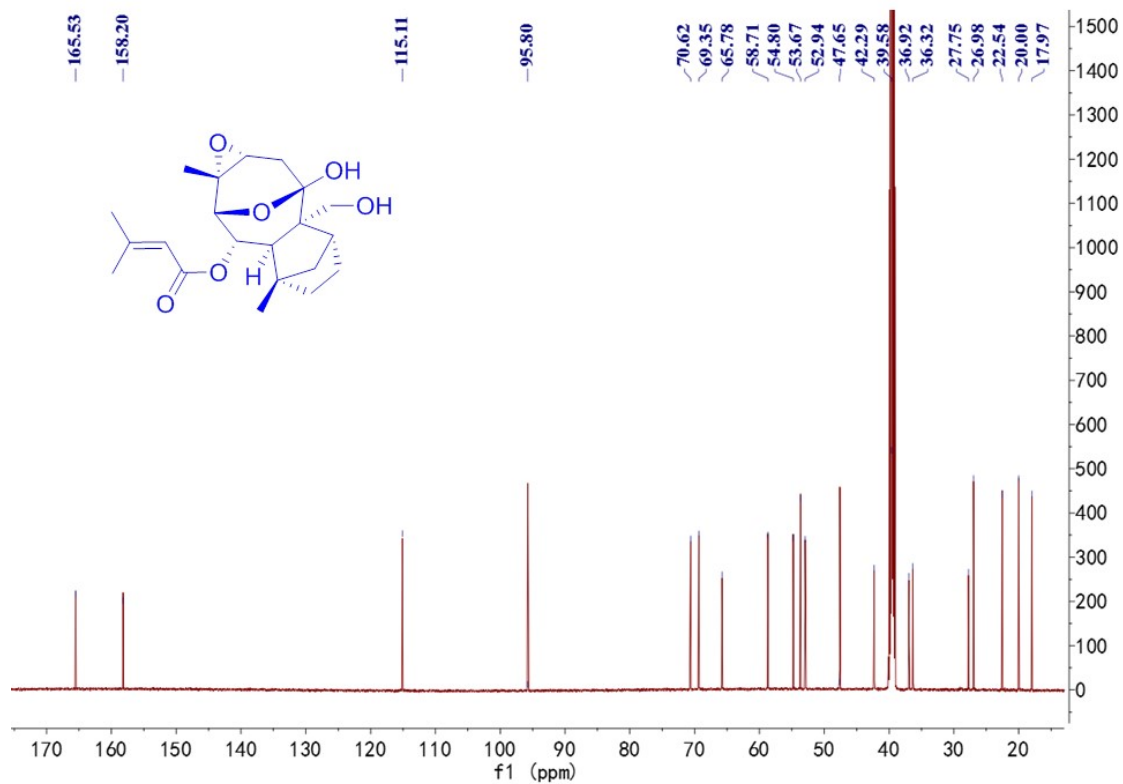

Figure S18  $^{13}\text{C}$  NMR spectrum (150 MHz,  $\text{DMSO-}d_6$ ) of compound 1.

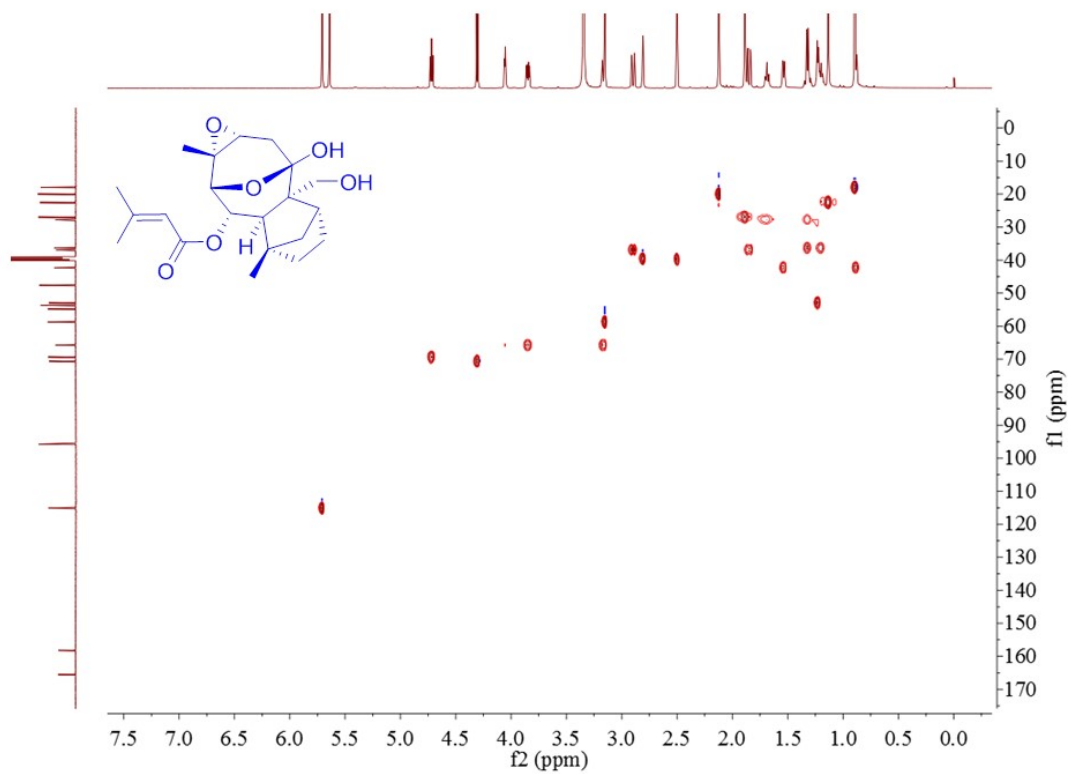

**Figure S19** HSQC spectrum (600 MHz,  $\text{DMSO-}d_6$ ) of compound **1**.

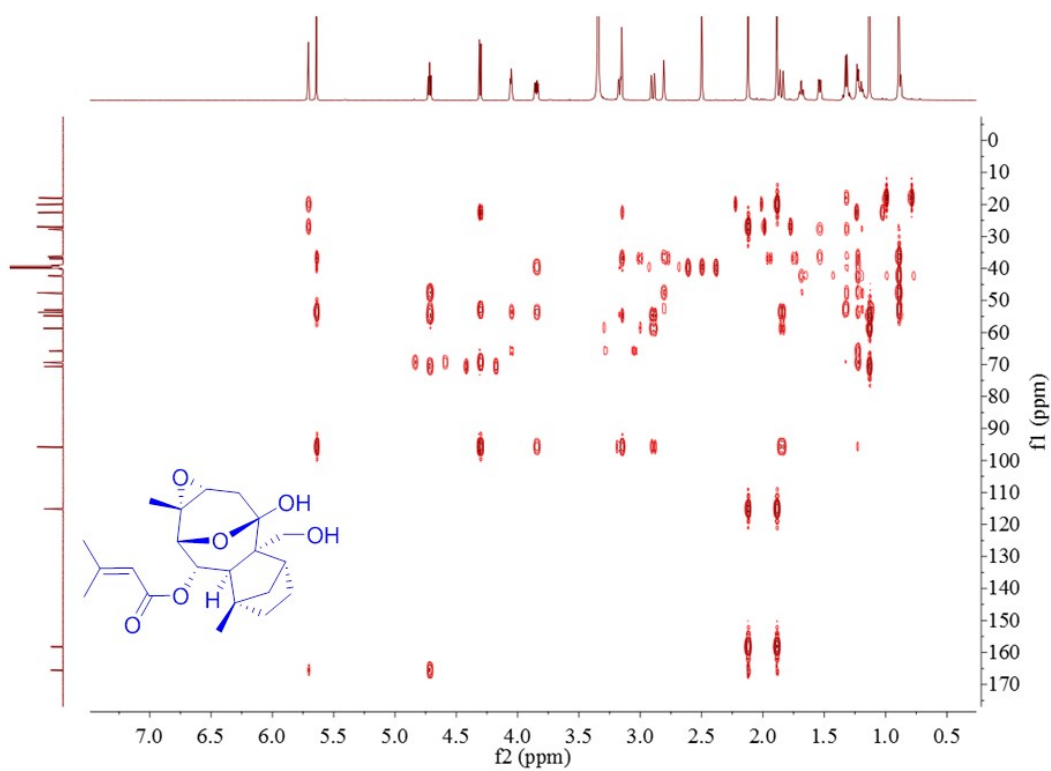

**Figure S20** HMBC spectrum (600 MHz,  $\text{DMSO-}d_6$ ) of compound **1**.



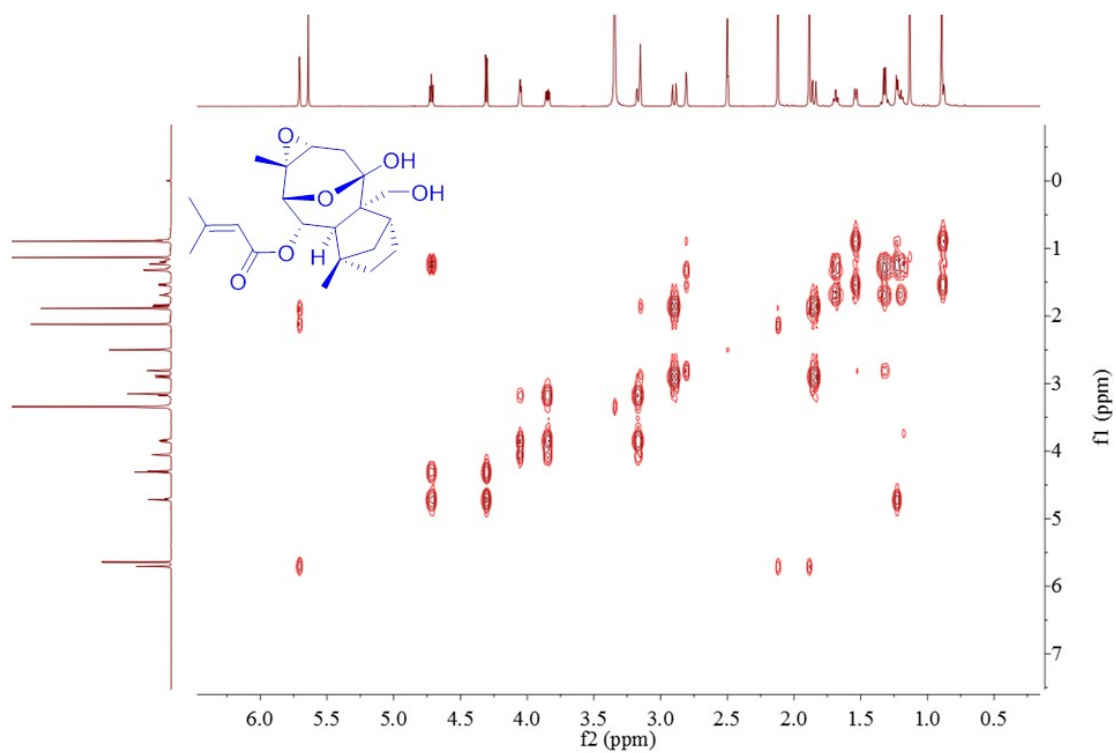

**Figure S21**  $^1\text{H}$ - $^1\text{H}$  COSY spectrum (600 MHz,  $\text{DMSO-}d_6$ ) of compound 1.

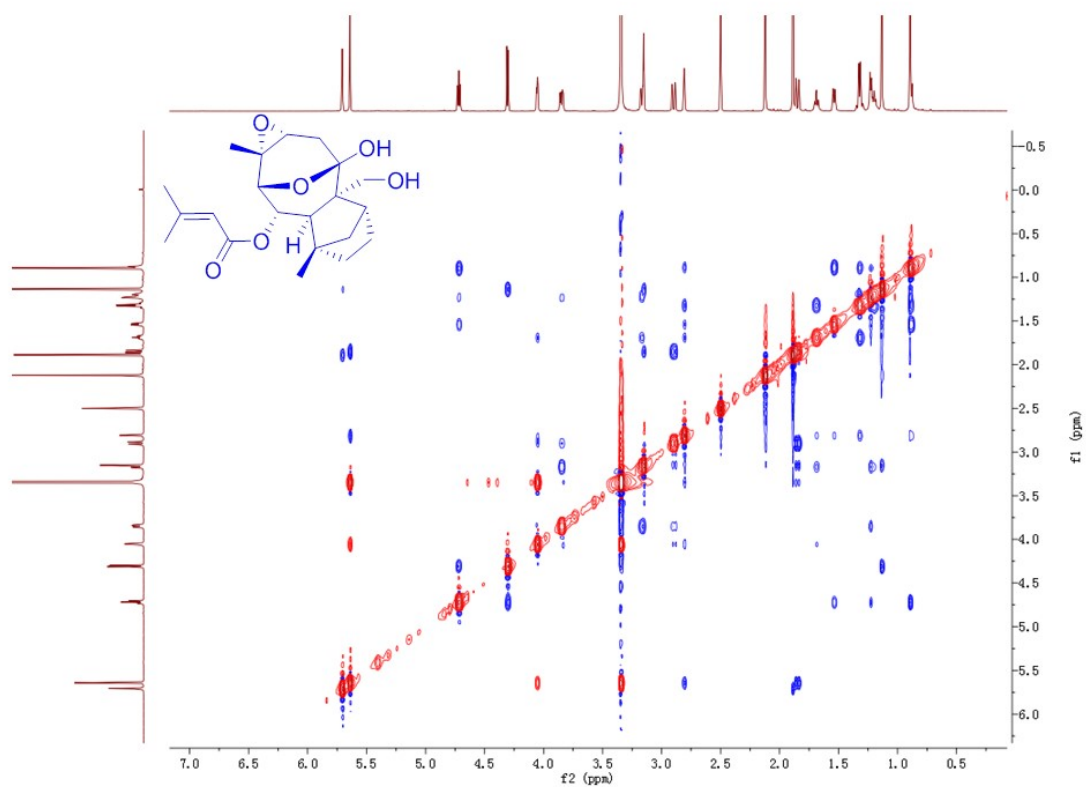

**Figure S22** NOESY spectrum (600 MHz,  $\text{DMSO-}d_6$ ) of compound 1.

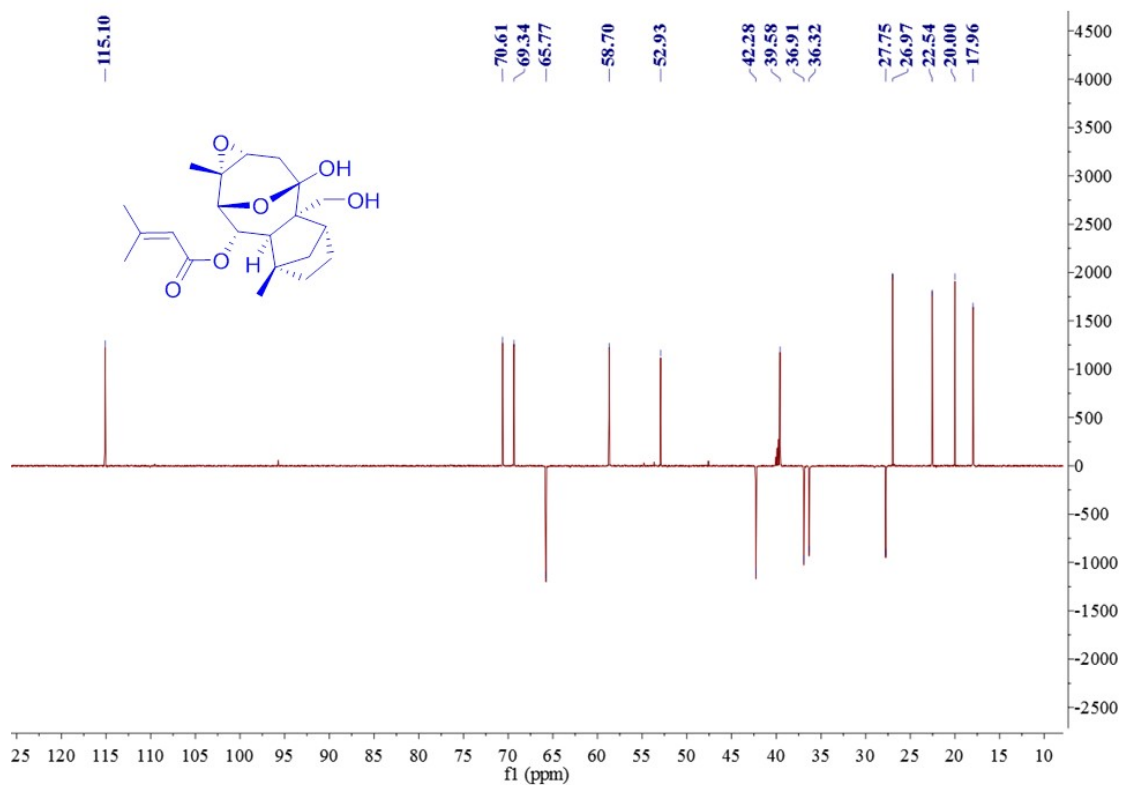

Figure S23 DEPT spectrum (600 MHz, DMSO- $d_6$ ) of compound 1.

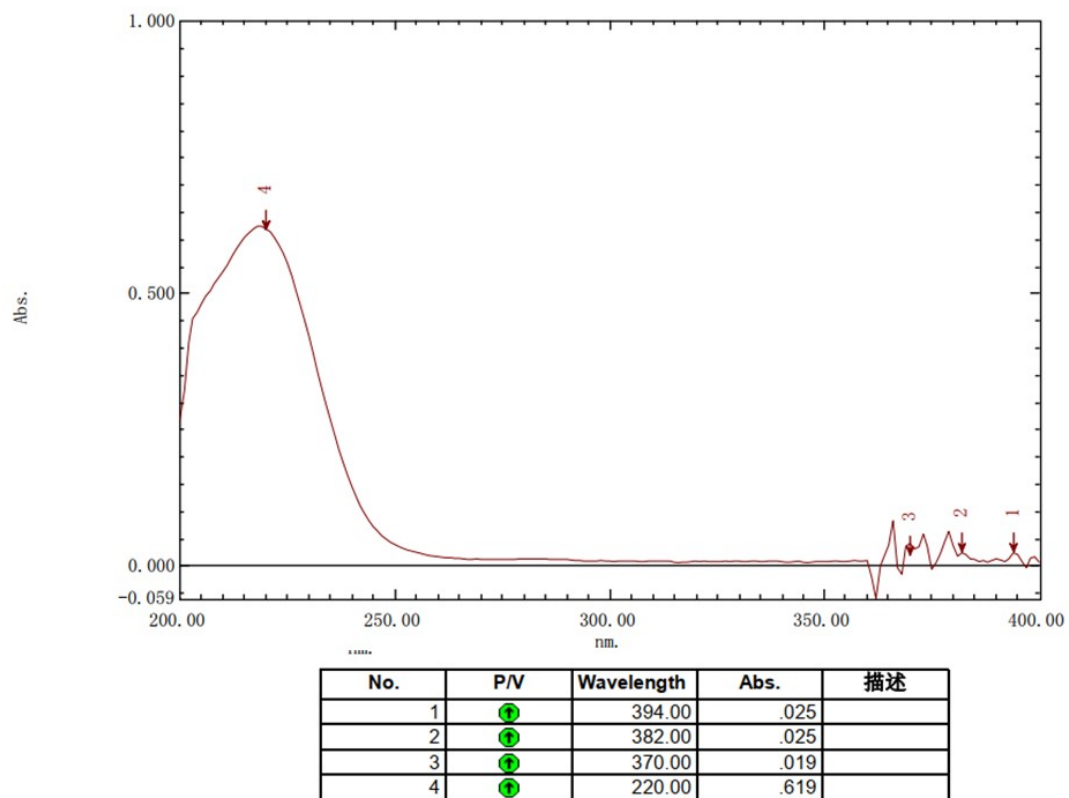

Figure S24 UV spectrum of compound 2.

## Mass Spectrum SmartFormula Report

|                      |                                                |                   |                       |
|----------------------|------------------------------------------------|-------------------|-----------------------|
| <b>Analysis Info</b> |                                                | Acquisition Date  | 6/26/2019 12:35:10 PM |
| Analysis Name        | D:\Data\20190626CEYANG\SHS-18_1-C,2_01_14000.d | Operator          | Bruker Customer       |
| Method               | 20190626ceyang.m                               | Instrument / Ser# | micrOTOF-Q 125        |
| Sample Name          | SHS-18                                         |                   |                       |
| Comment              |                                                |                   |                       |

|                              |          |                       |           |
|------------------------------|----------|-----------------------|-----------|
| <b>Acquisition Parameter</b> |          |                       |           |
| Source Type                  | ESI      | Ion Polarity          | Positive  |
| Focus                        | Active   | Set Capillary         | 4500 V    |
| Scan Begin                   | 50 m/z   | Set End Plate Offset  | -500 V    |
| Scan End                     | 1500 m/z | Set Collision Cell RF | 400.0 Vpp |
|                              |          | Set Nebulizer         | 1.2 Bar   |
|                              |          | Set Dry Heater        | 180 °C    |
|                              |          | Set Dry Gas           | 8.0 l/min |
|                              |          | Set Divert Valve      | Source    |

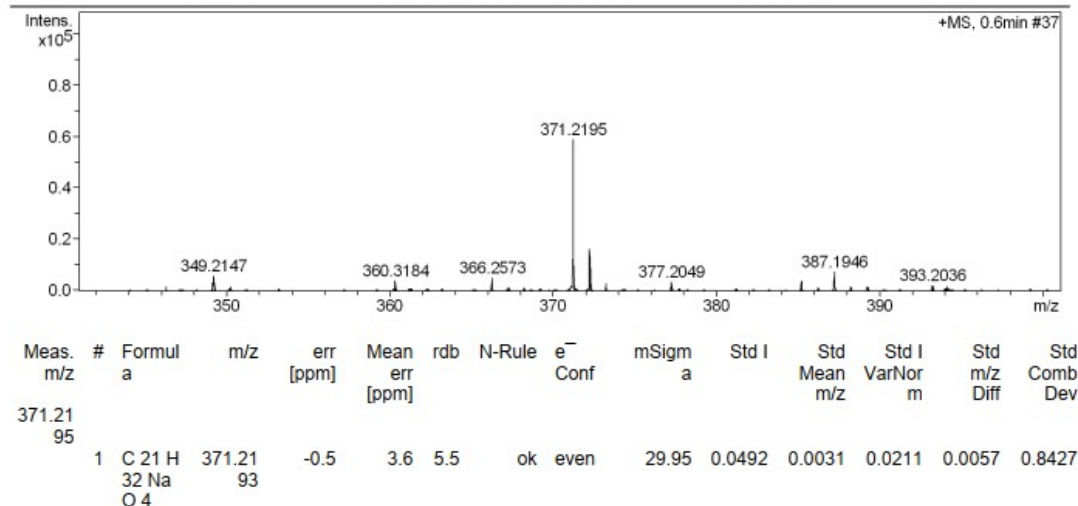

**Figure S25** HRESIMS spectrum of compound **2**.

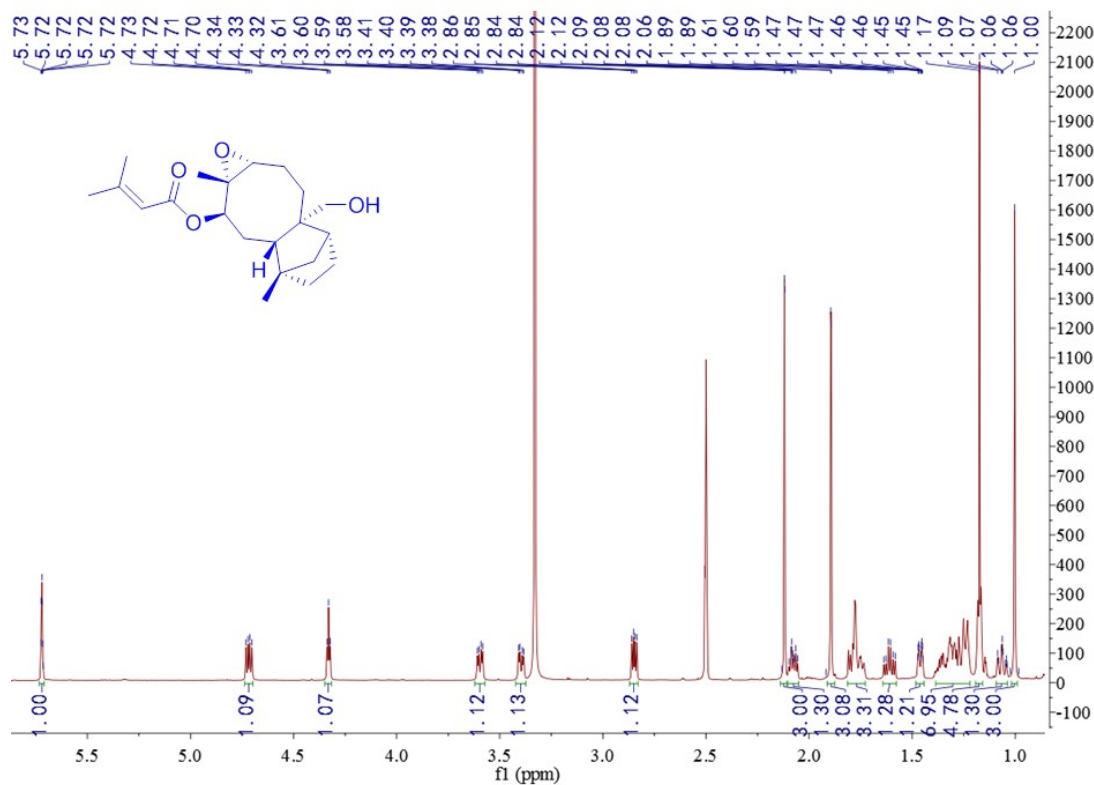

**Figure S26** <sup>1</sup>H NMR spectrum (600 MHz, DMSO-*d*<sub>6</sub>) of compound **2**.

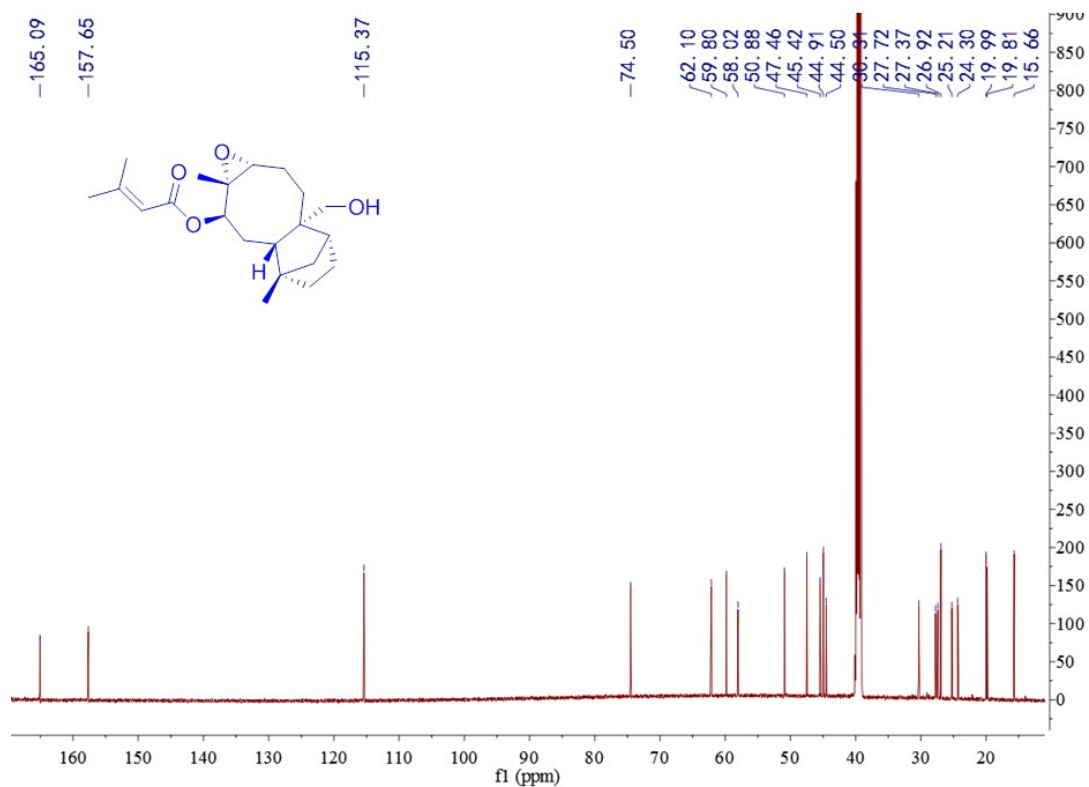

**Figure S27**  $^{13}\text{C}$  NMR spectrum (150 MHz,  $\text{DMSO-}d_6$ ) of compound **2**.

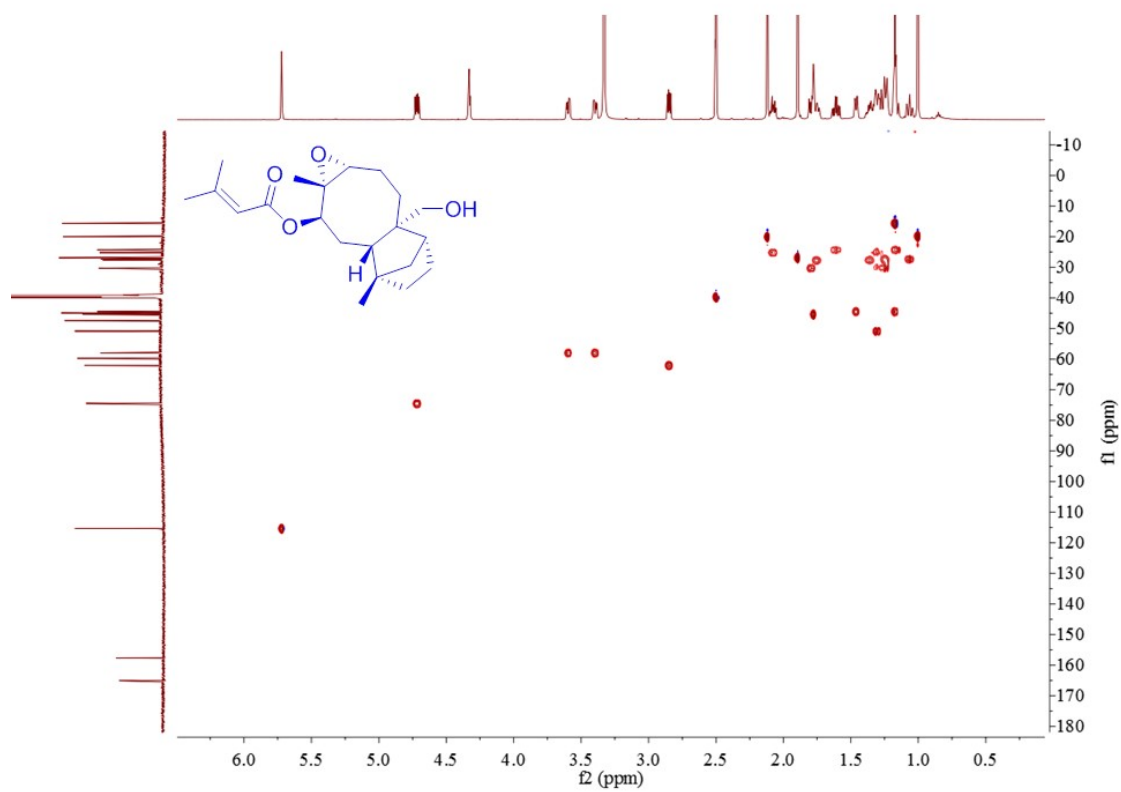

**Figure S28** HSQC spectrum (600 MHz,  $\text{DMSO-}d_6$ ) of compound **2**.

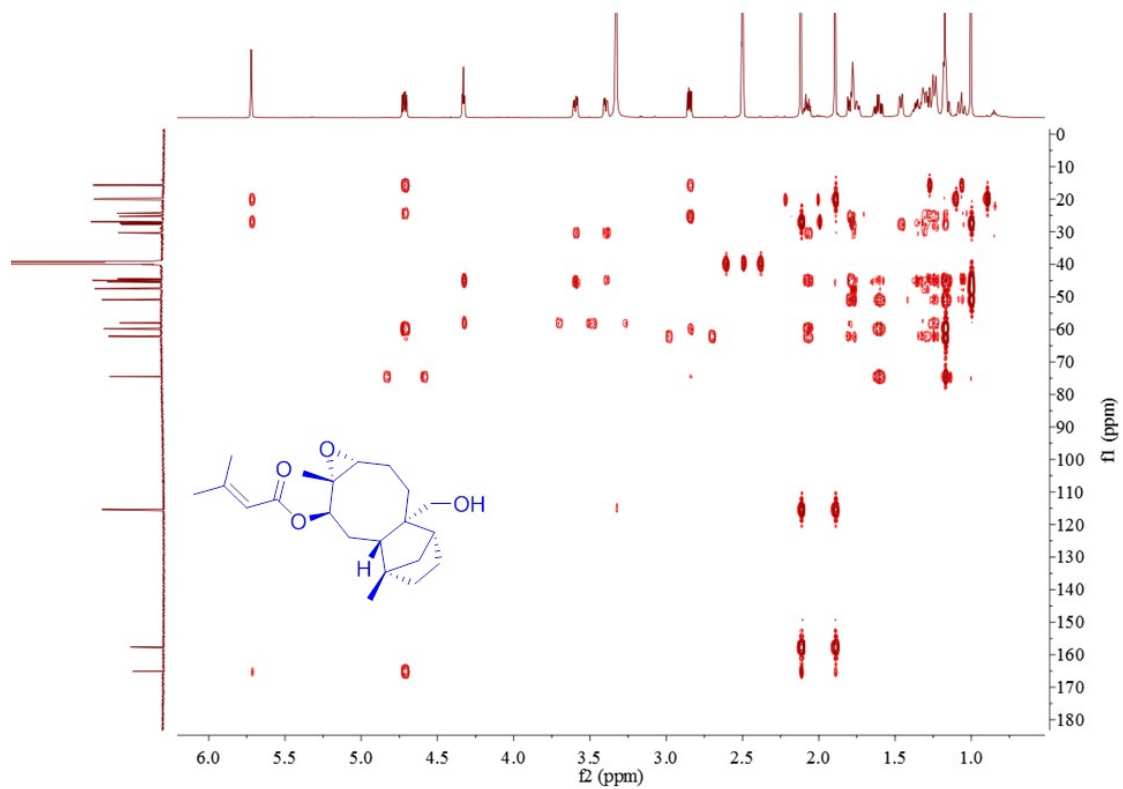

**Figure S29** HMBC spectrum (600 MHz,  $\text{DMSO-}d_6$ ) of compound **2**.

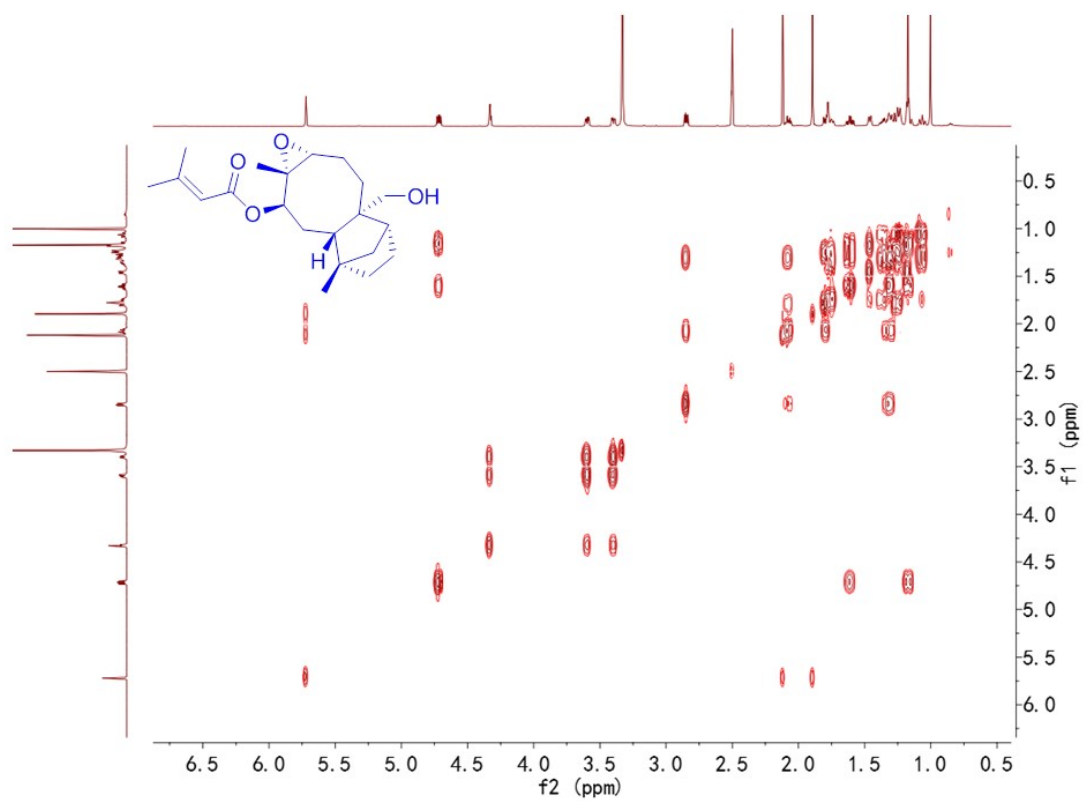

**Figure S30**  $^1\text{H}$ - $^1\text{H}$  COSY spectrum (600 MHz,  $\text{DMSO-}d_6$ ) of compound **2**.

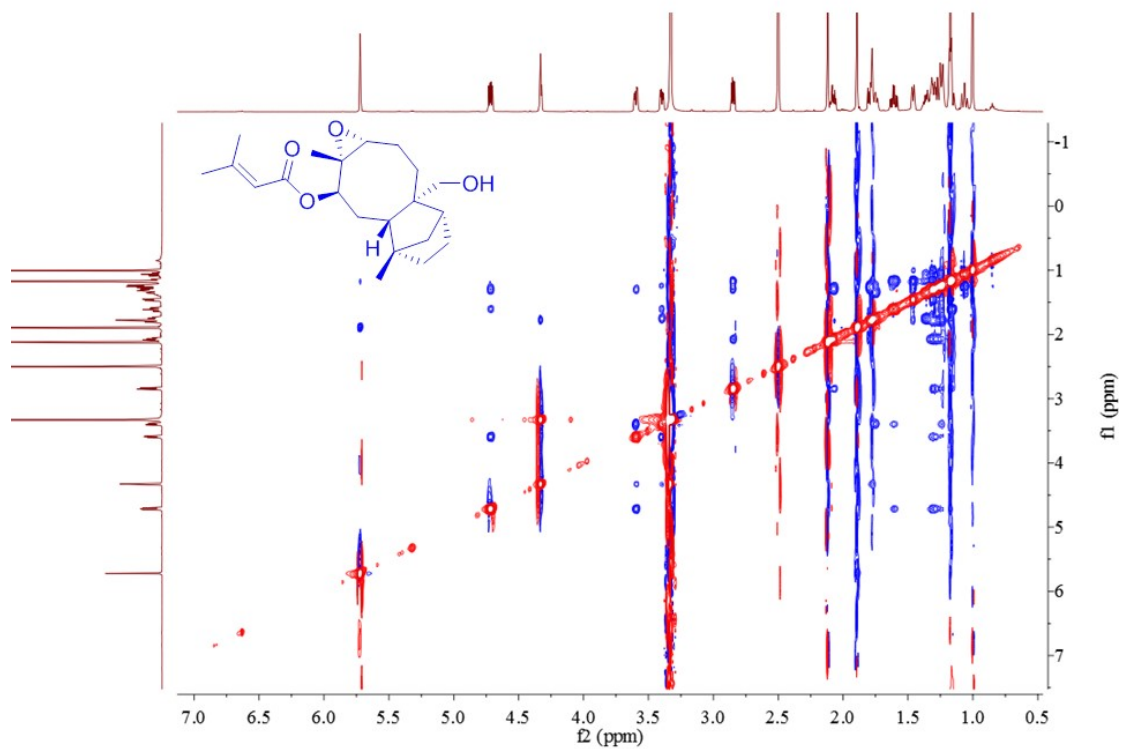

**Figure S31** NOESY spectrum (600 MHz, DMSO-*d*<sub>6</sub>) of compound **2**.

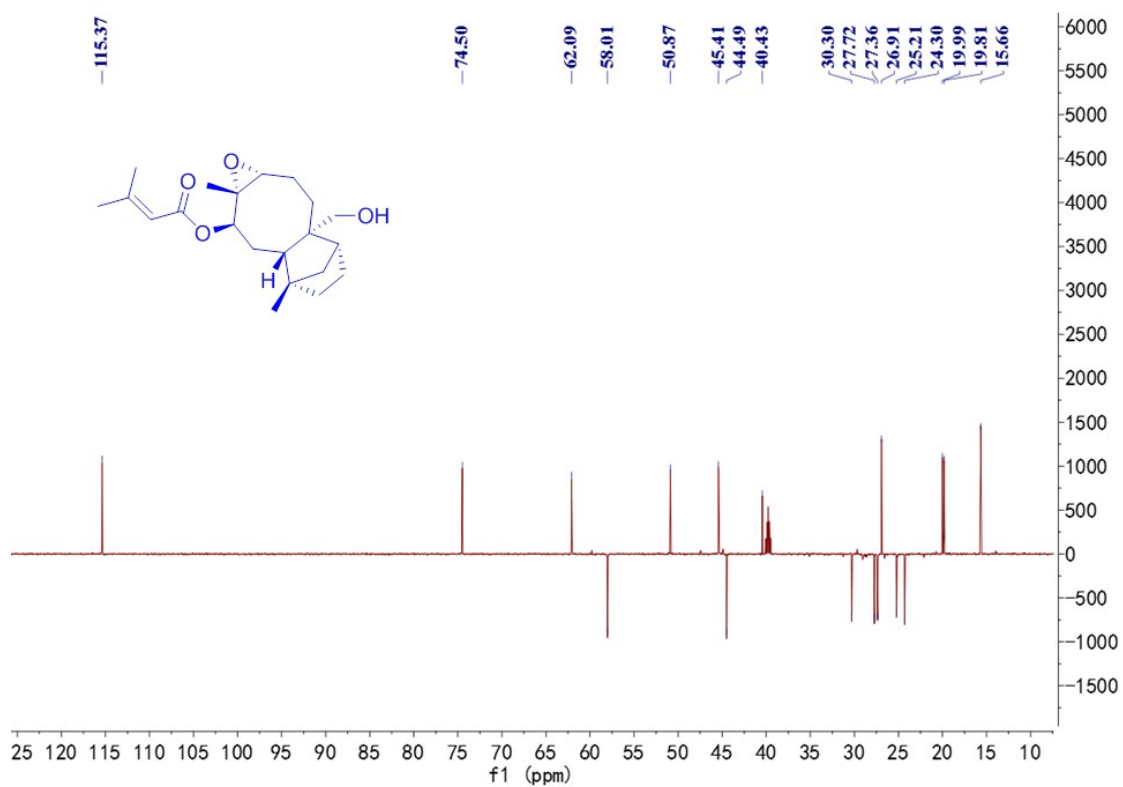

**Figure S32** DEPT spectrum (600 MHz, DMSO-*d*<sub>6</sub>) of compound **2**.

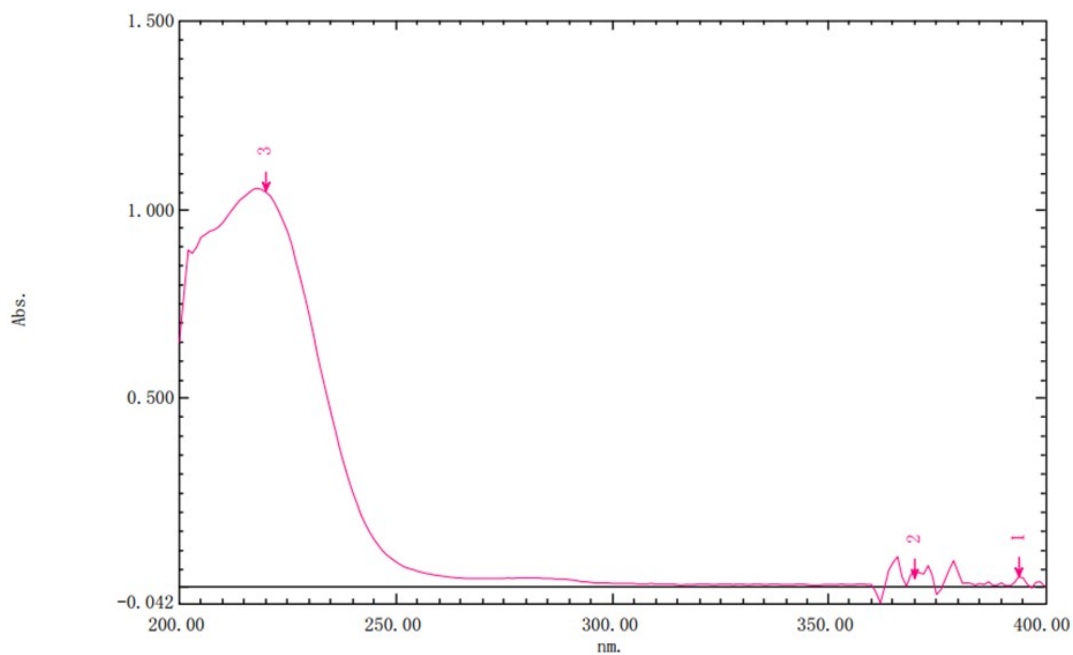

| No. | P/V | Wavelength | Abs.  | 描述 |
|-----|-----|------------|-------|----|
| 1   | ↑   | 394.00     | .026  |    |
| 2   | ↑   | 370.00     | .020  |    |
| 3   | ↑   | 220.00     | 1.047 |    |

Figure S33 UV spectrum of compound 3.

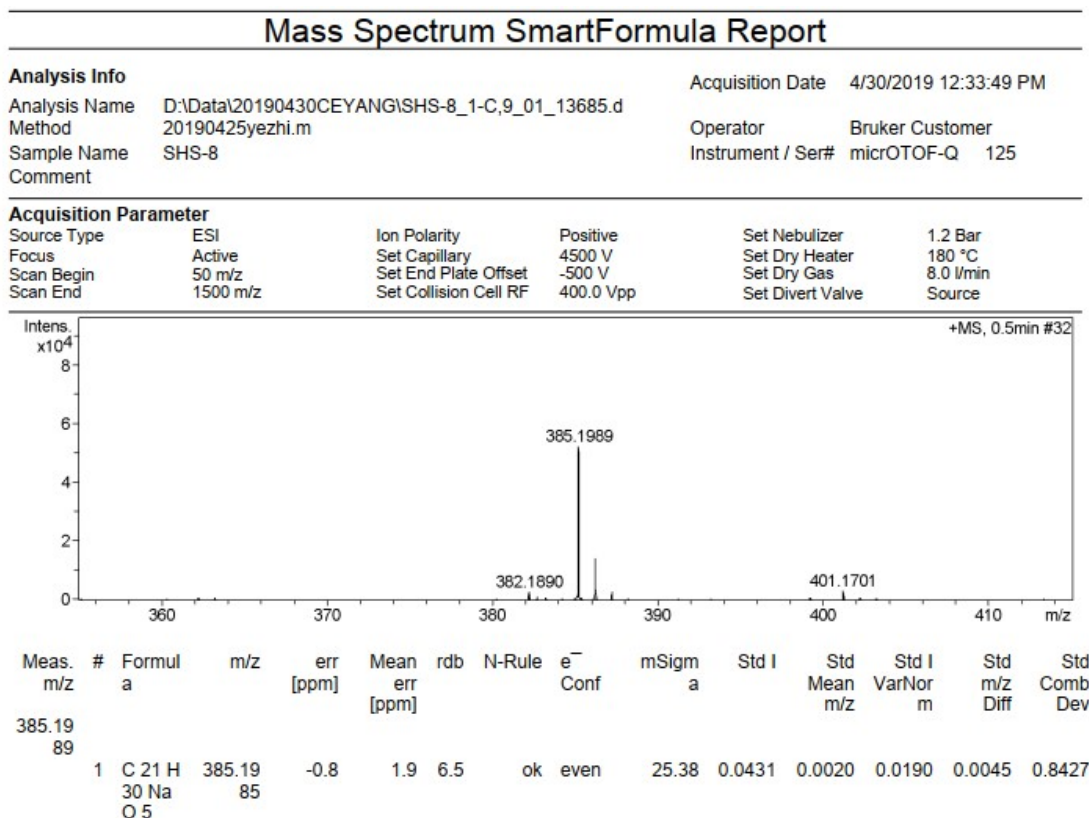

Figure S34 HRESIMS spectrum of compound 3.

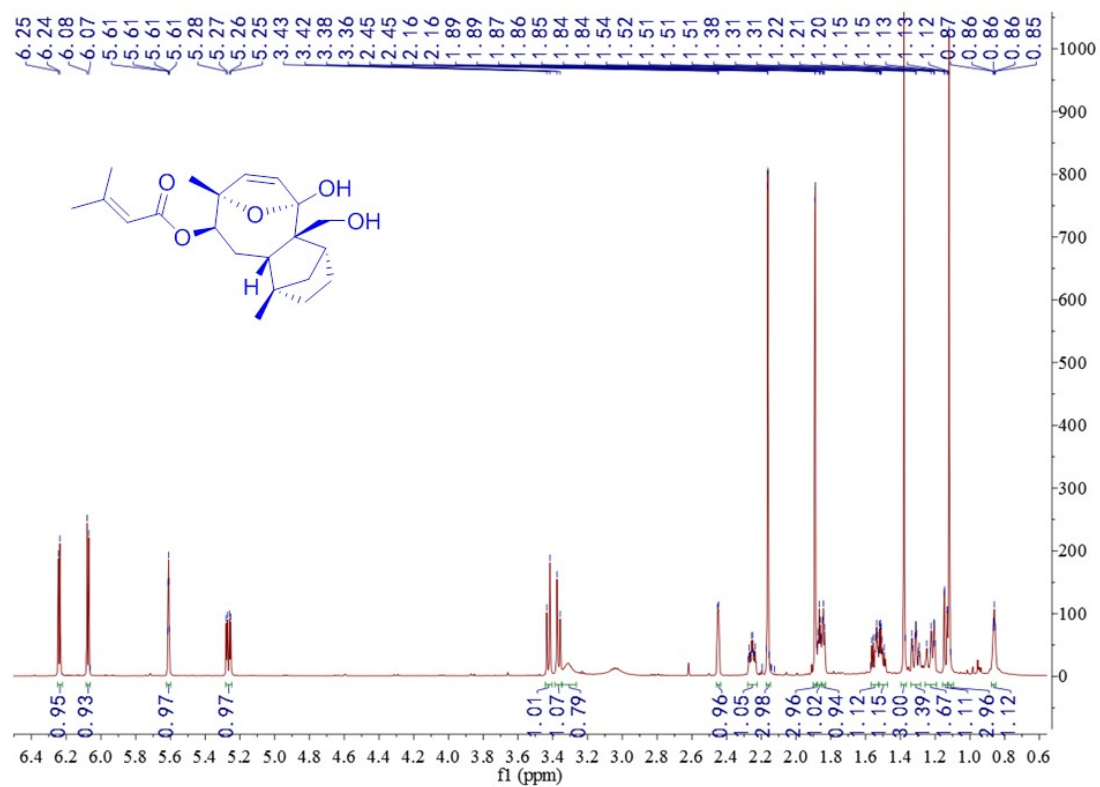

Figure S35  $^1\text{H}$  NMR spectrum (600 MHz,  $\text{CDCl}_3$ ) of compound 3.

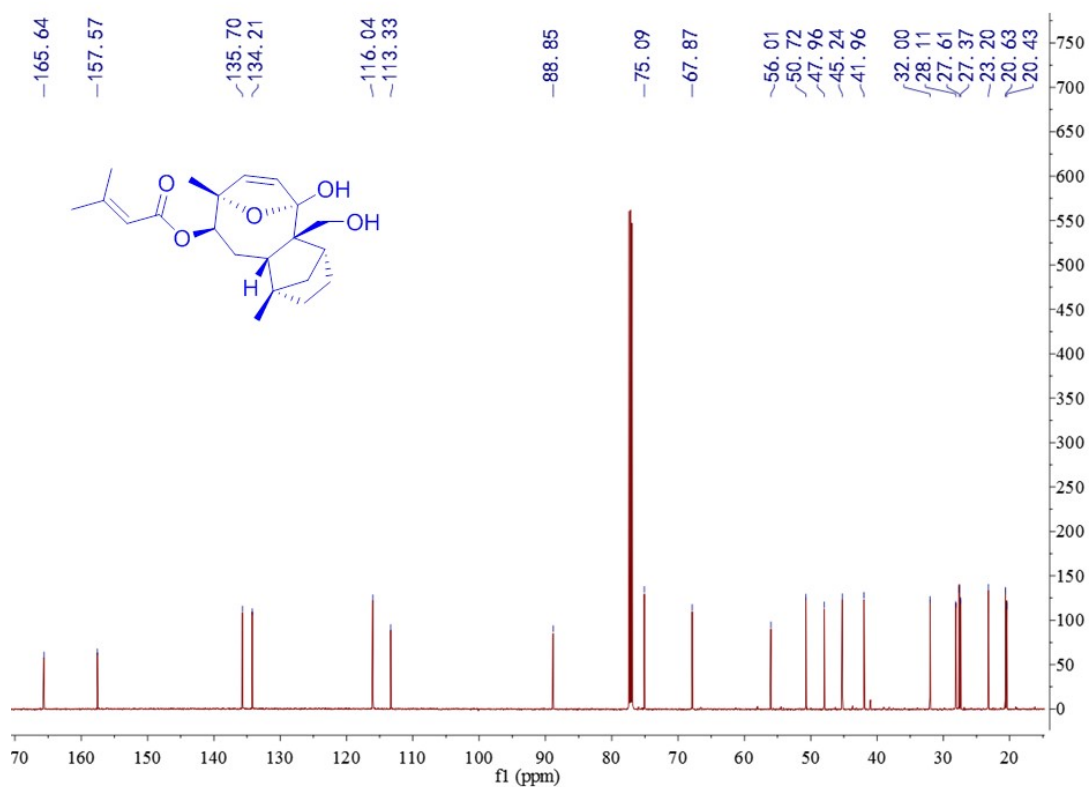

Figure S36  $^{13}\text{C}$  NMR spectrum (150 MHz,  $\text{CDCl}_3$ ) of compound 3.



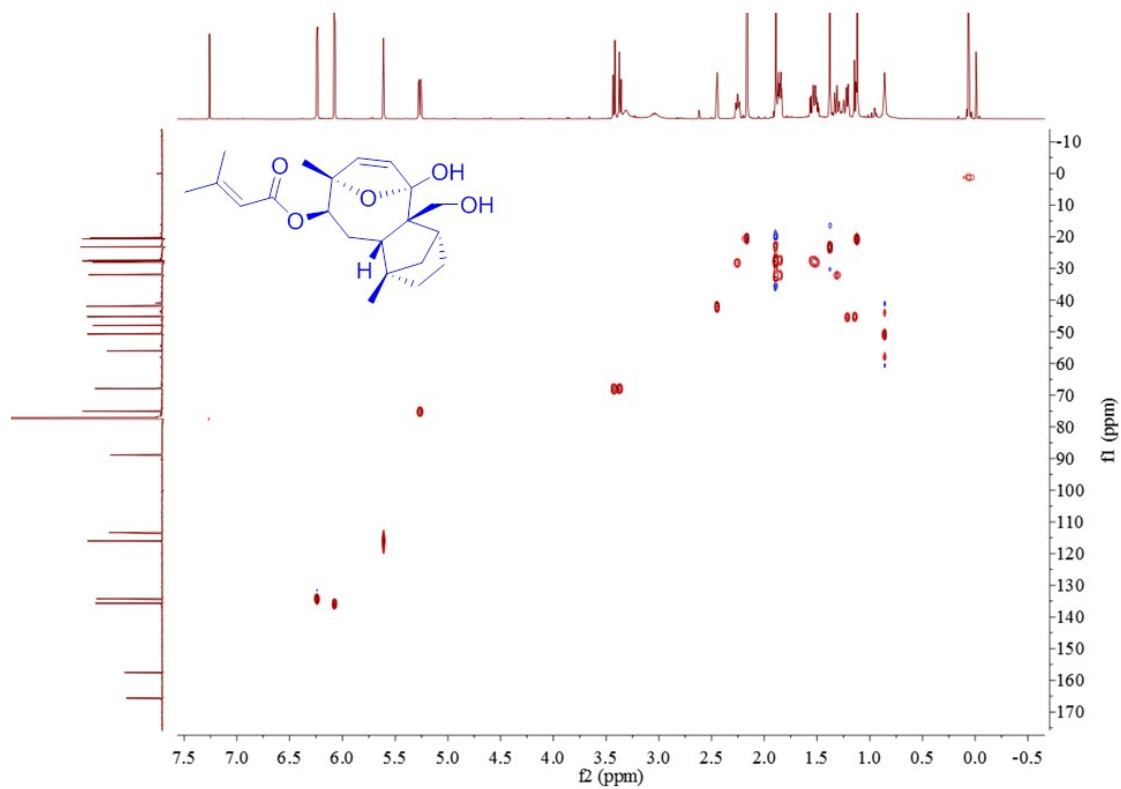

**Figure S37** HSQC spectrum (600 MHz, CDCl<sub>3</sub>) of compound **3**.

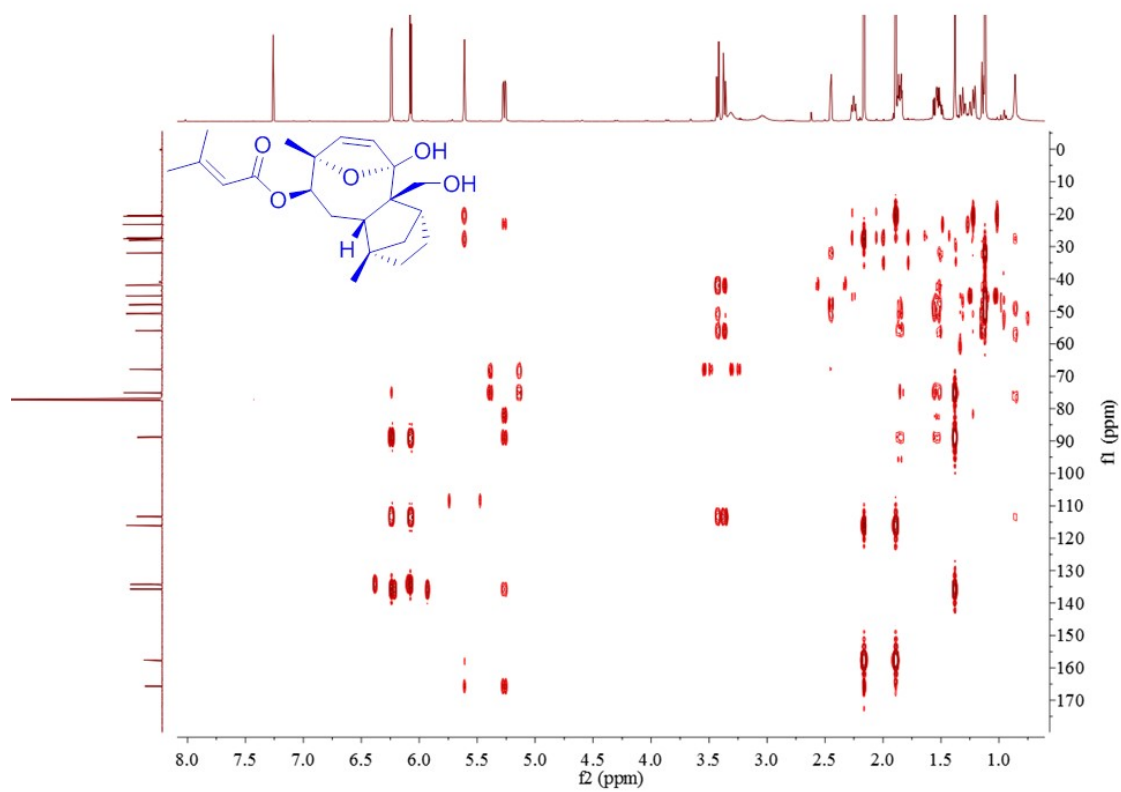

**Figure S38** HMBC spectrum (600 MHz, CDCl<sub>3</sub>) of compound **3**.

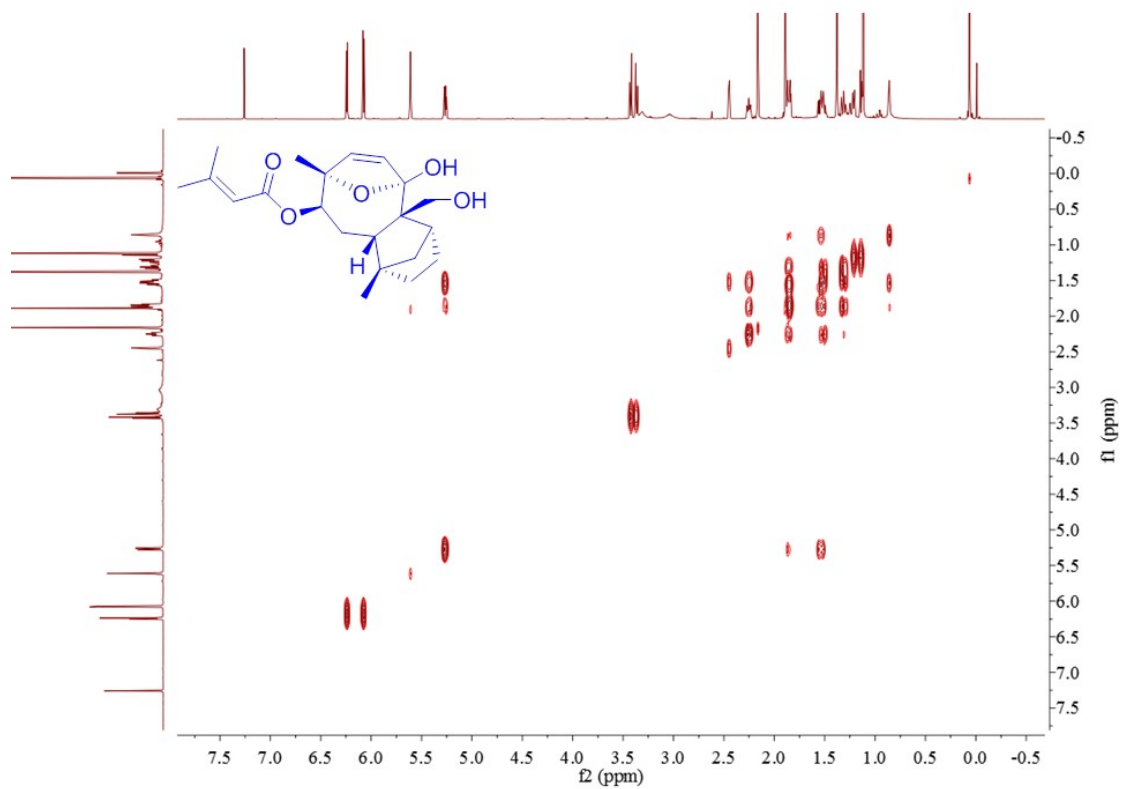

**Figure S39**  $^1\text{H}$ - $^1\text{H}$  COSY spectrum (600 MHz,  $\text{CDCl}_3$ ) of compound **3**.

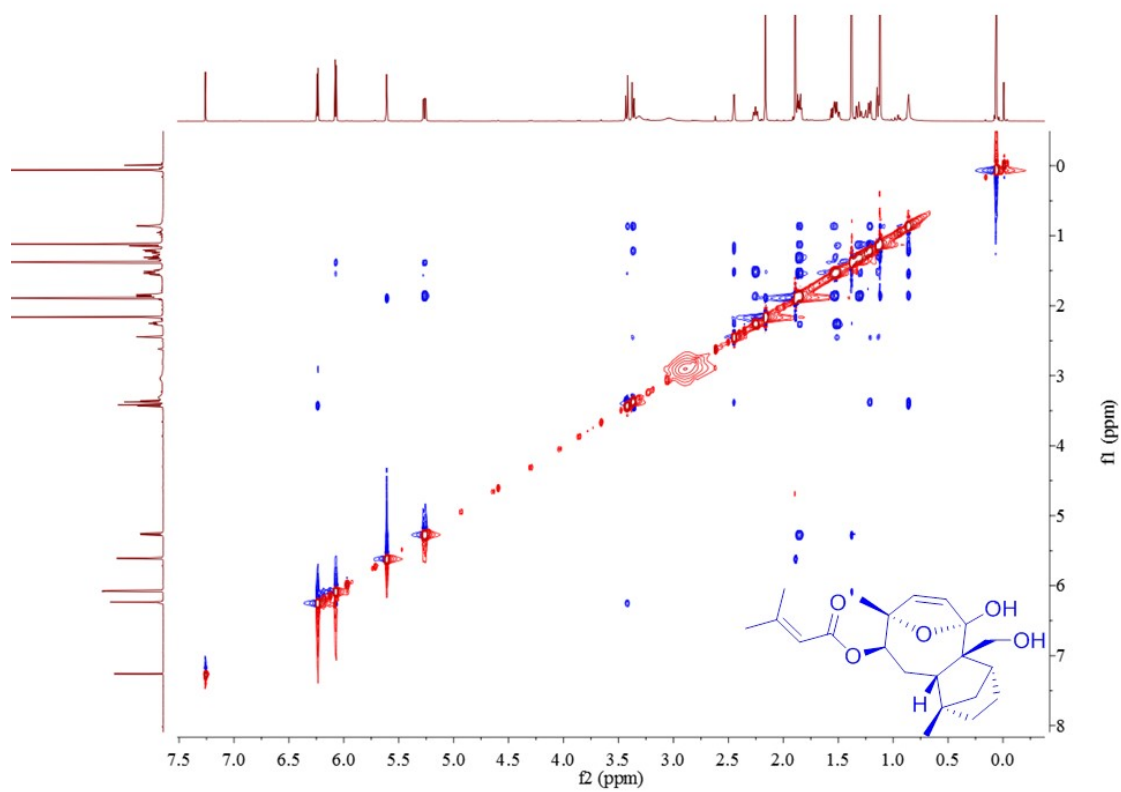

**Figure S40** NOESY spectrum (600 MHz,  $\text{CDCl}_3$ ) of compound **3**.

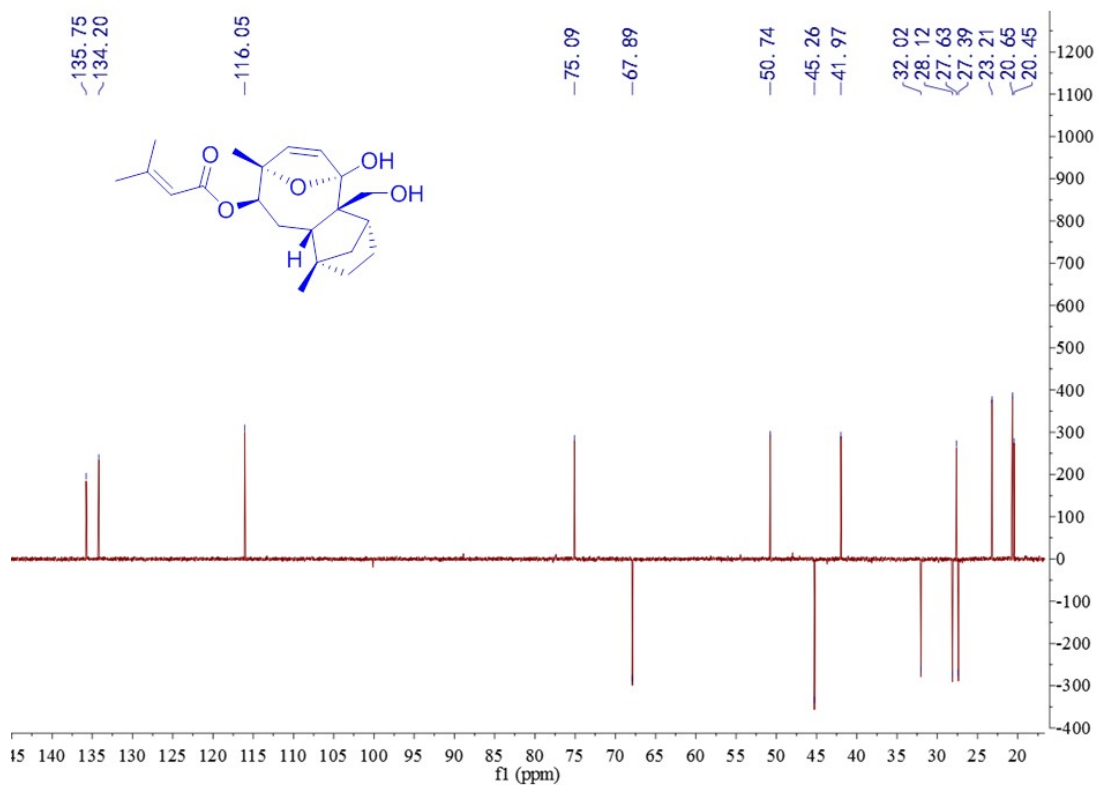

**Figure S41** DEPT spectrum (600 MHz,  $\text{CDCl}_3$ ) of compound **3**.

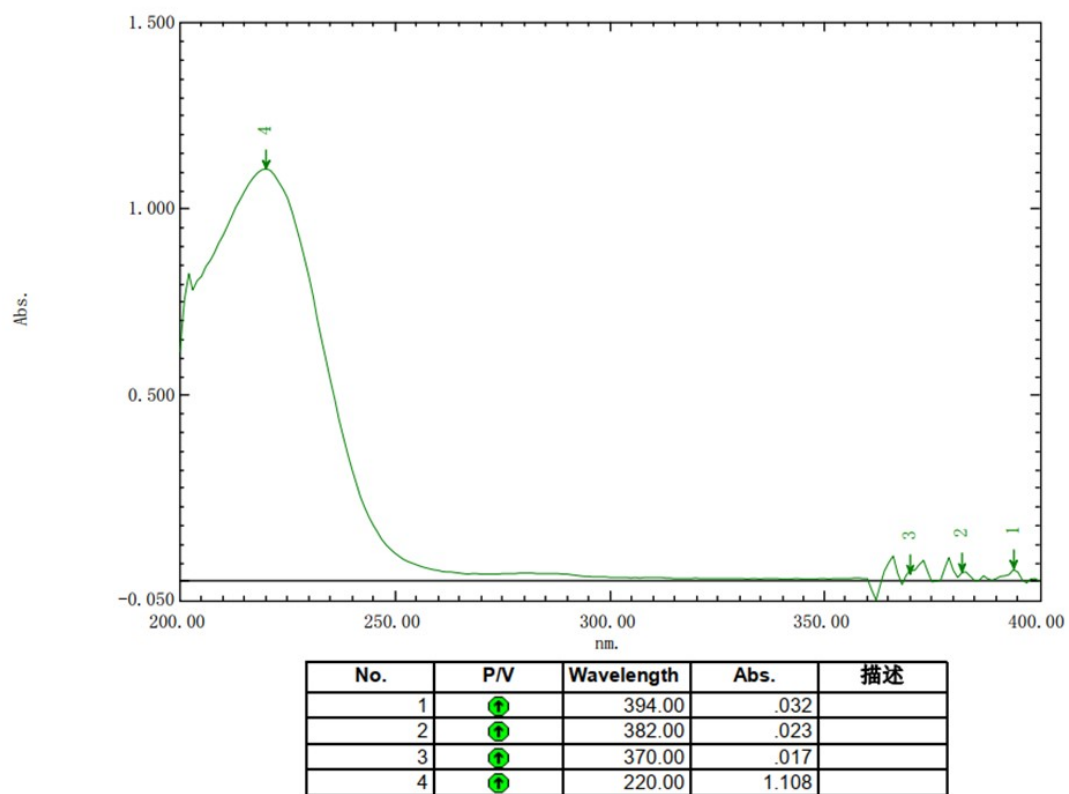

**Figure S42** UV spectrum of compound **4**.

## Mass Spectrum SmartFormula Report

### Analysis Info

Analysis Name D:\Data\20190430CEYANG\SHS-14\_1-C,6\_01\_13682.d  
 Method 20190425yezhi.m  
 Sample Name SHS-14  
 Comment

Acquisition Date 4/30/2019 12:22:36 PM

Operator Bruker Customer  
 Instrument / Ser# micrOTOF-Q 125

### Acquisition Parameter

|             |          |                       |           |                  |           |
|-------------|----------|-----------------------|-----------|------------------|-----------|
| Source Type | ESI      | Ion Polarity          | Positive  | Set Nebulizer    | 1.2 Bar   |
| Focus       | Active   | Set Capillary         | 4500 V    | Set Dry Heater   | 180 °C    |
| Scan Begin  | 50 m/z   | Set End Plate Offset  | -500 V    | Set Dry Gas      | 8.0 l/min |
| Scan End    | 1500 m/z | Set Collision Cell RF | 400.0 Vpp | Set Divert Valve | Source    |

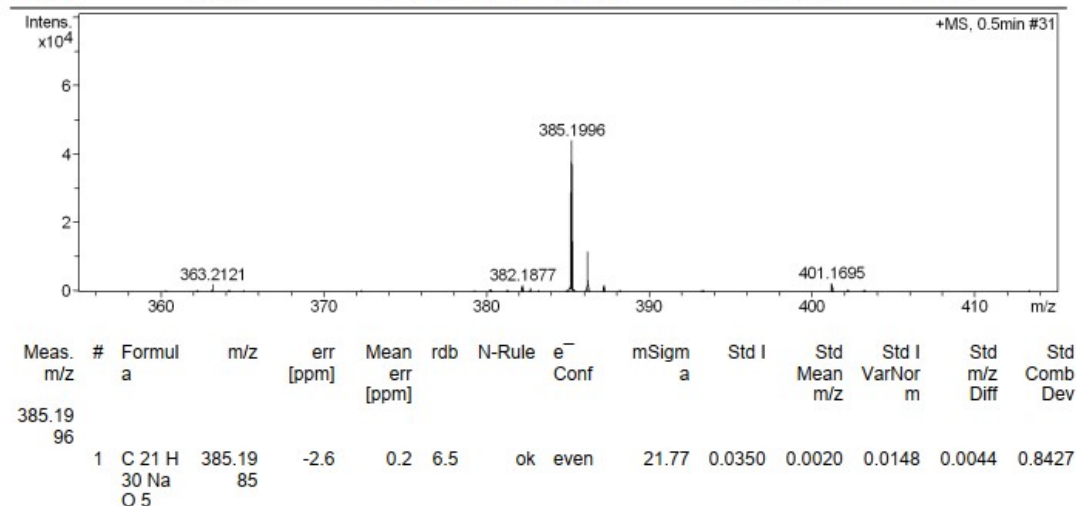

**Figure S43** HRESIMS spectrum of compound **4**.

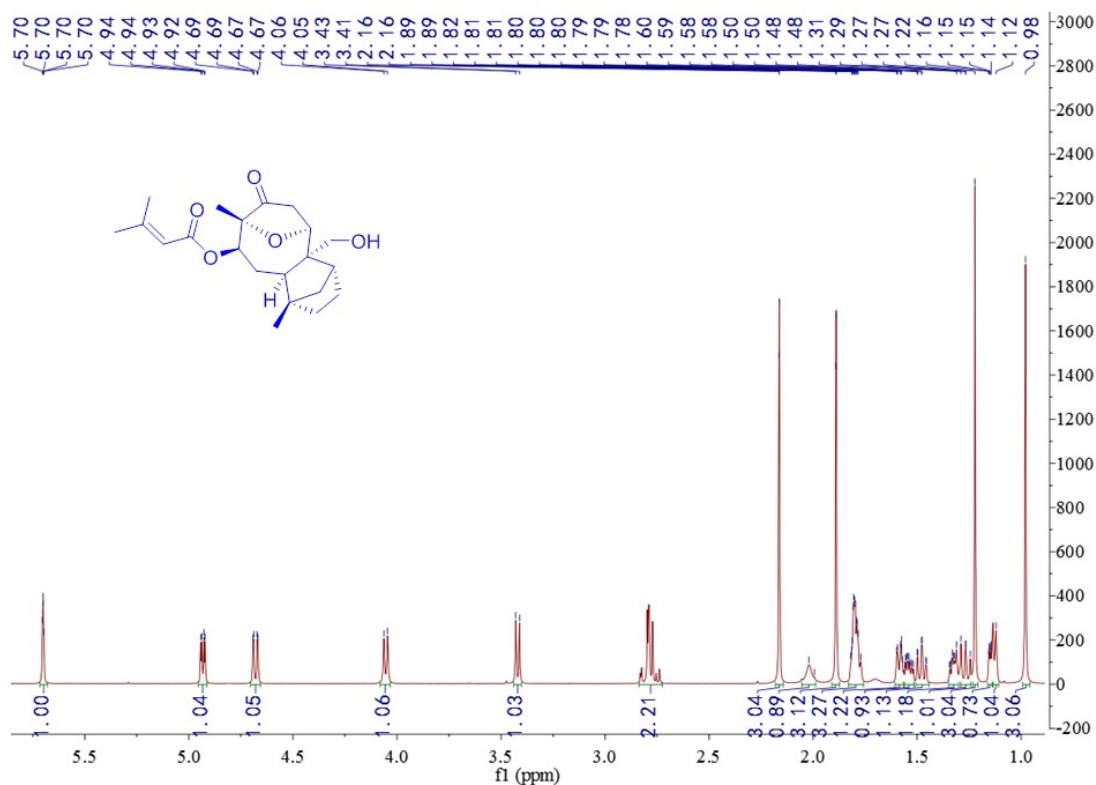

**Figure S44** <sup>1</sup>H NMR spectrum (600 MHz, CDCl<sub>3</sub>) of compound **4**.

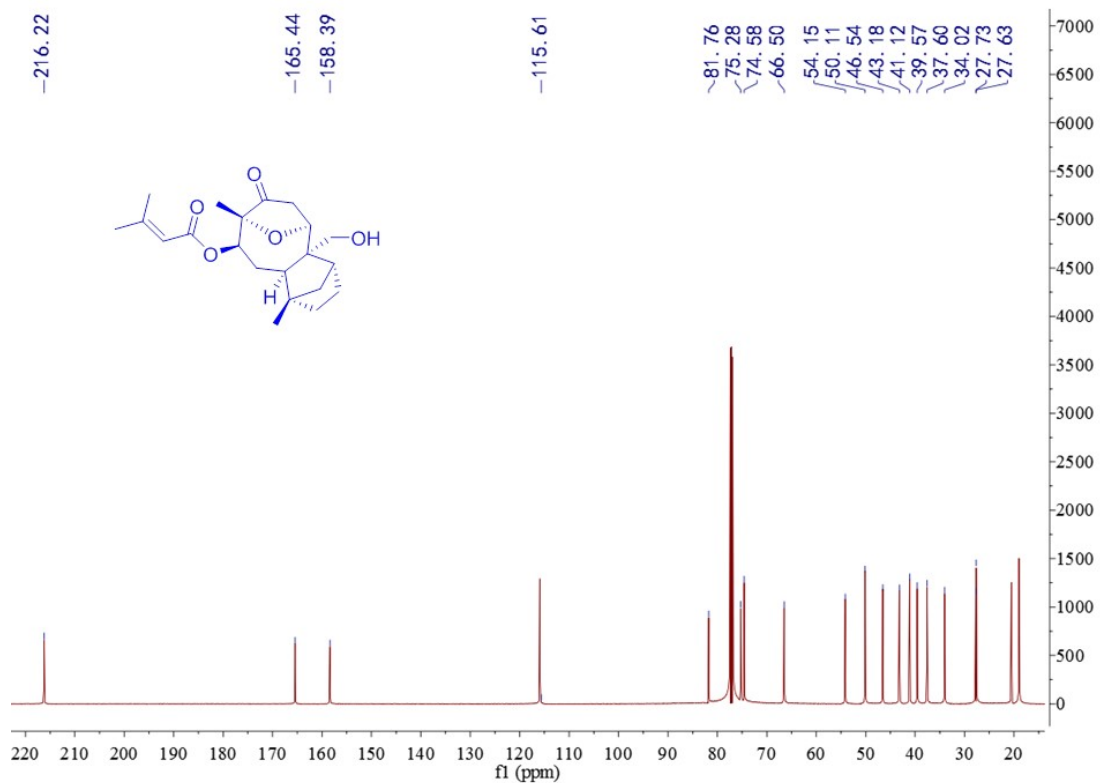

**Figure S45**  $^{13}\text{C}$  NMR spectrum (150 MHz,  $\text{CDCl}_3$ ) of compound 4.

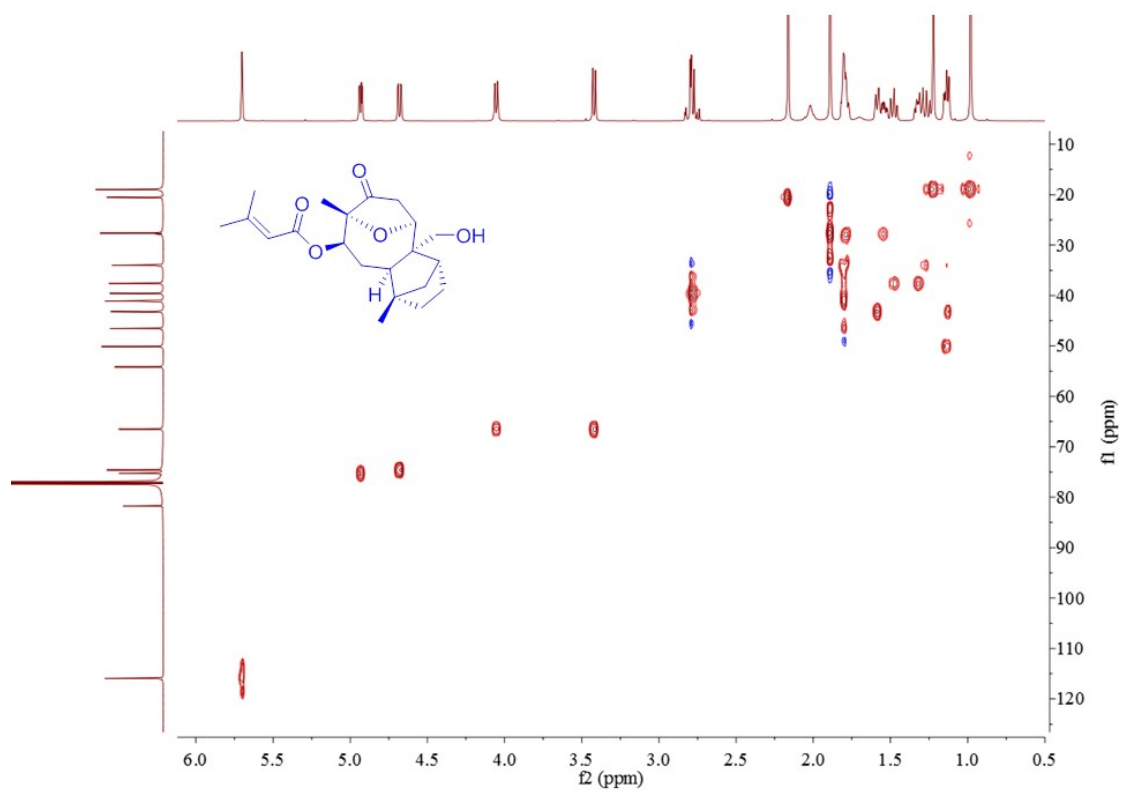

**Figure S46** HSQC spectrum (600 MHz,  $\text{CDCl}_3$ ) of compound 4.

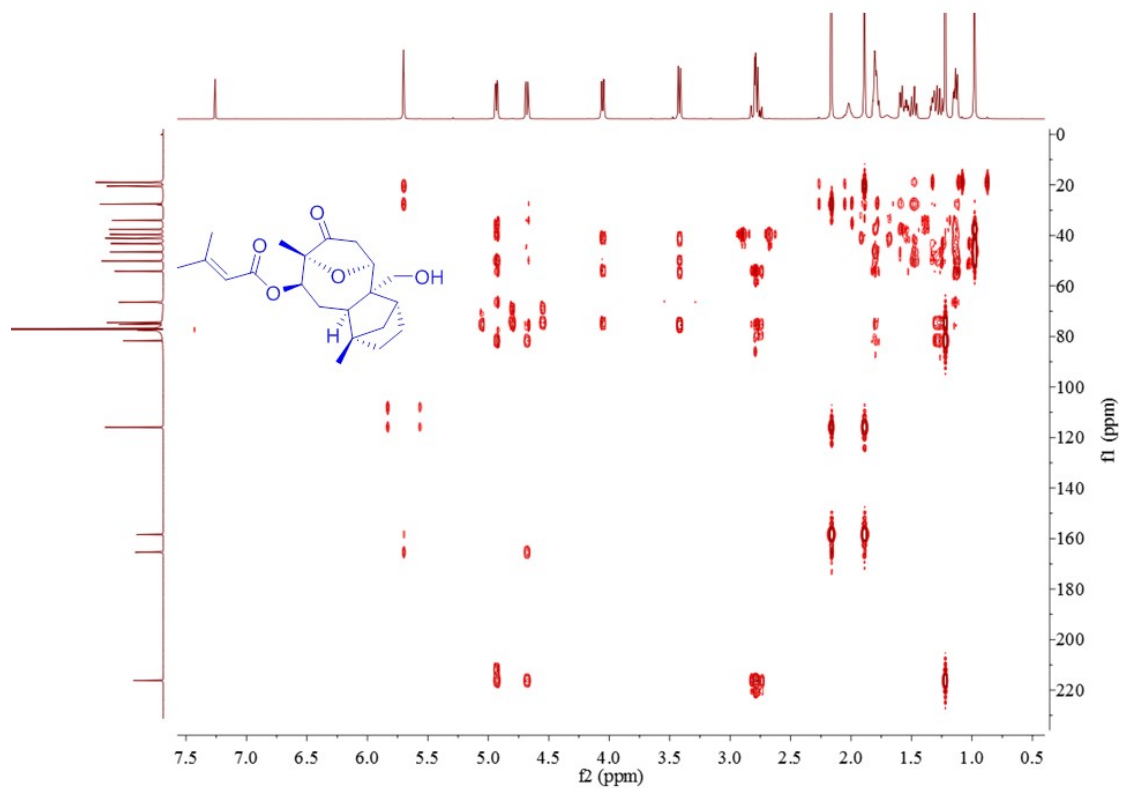

**Figure S47** HMBC spectrum (600 MHz,  $\text{CDCl}_3$ ) of compound **4**.

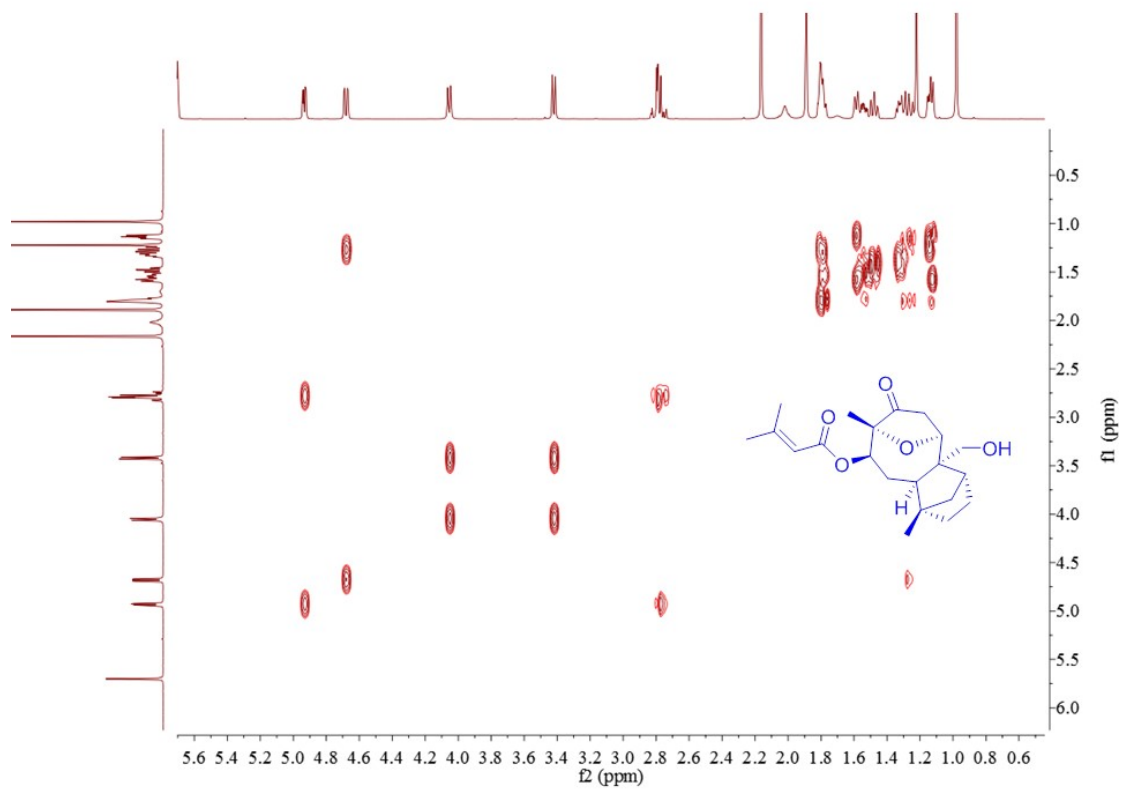

**Figure S48**  $^1\text{H}$ - $^1\text{H}$  COSY spectrum (600 MHz,  $\text{CDCl}_3$ ) of compound **4**.

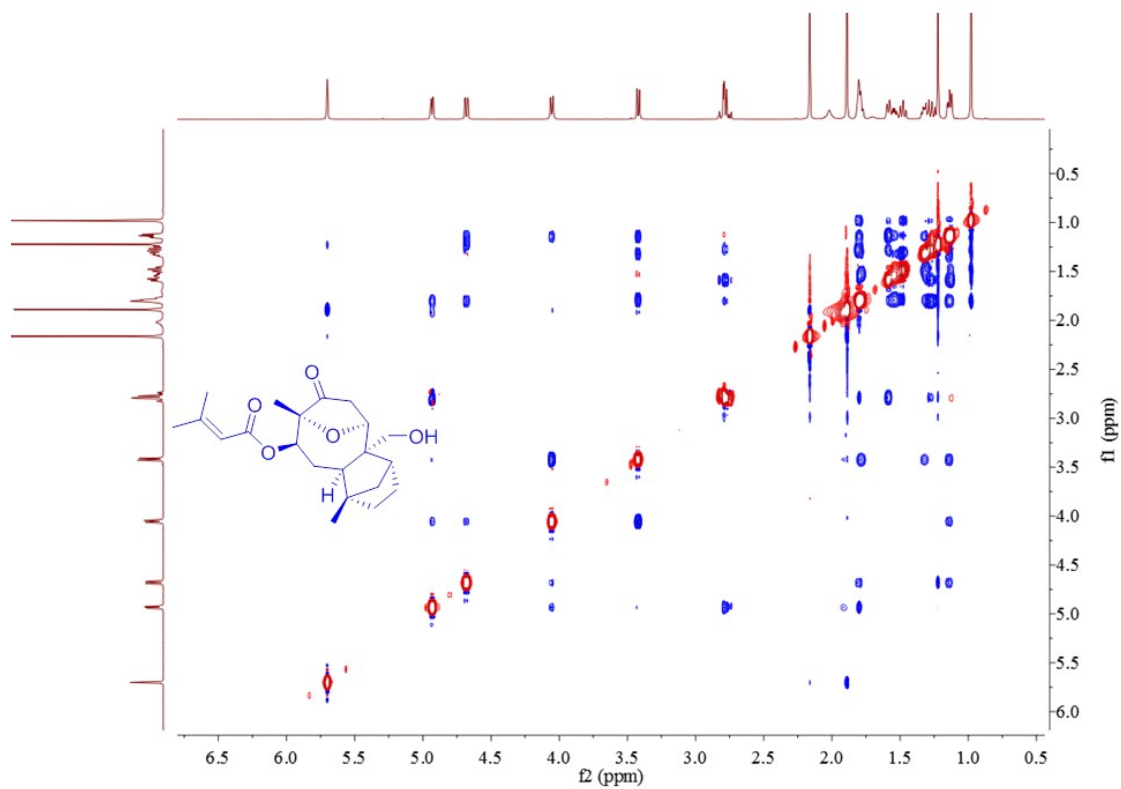

**Figure S49** NOESY spectrum (600 MHz,  $\text{CDCl}_3$ ) of compound **4**.

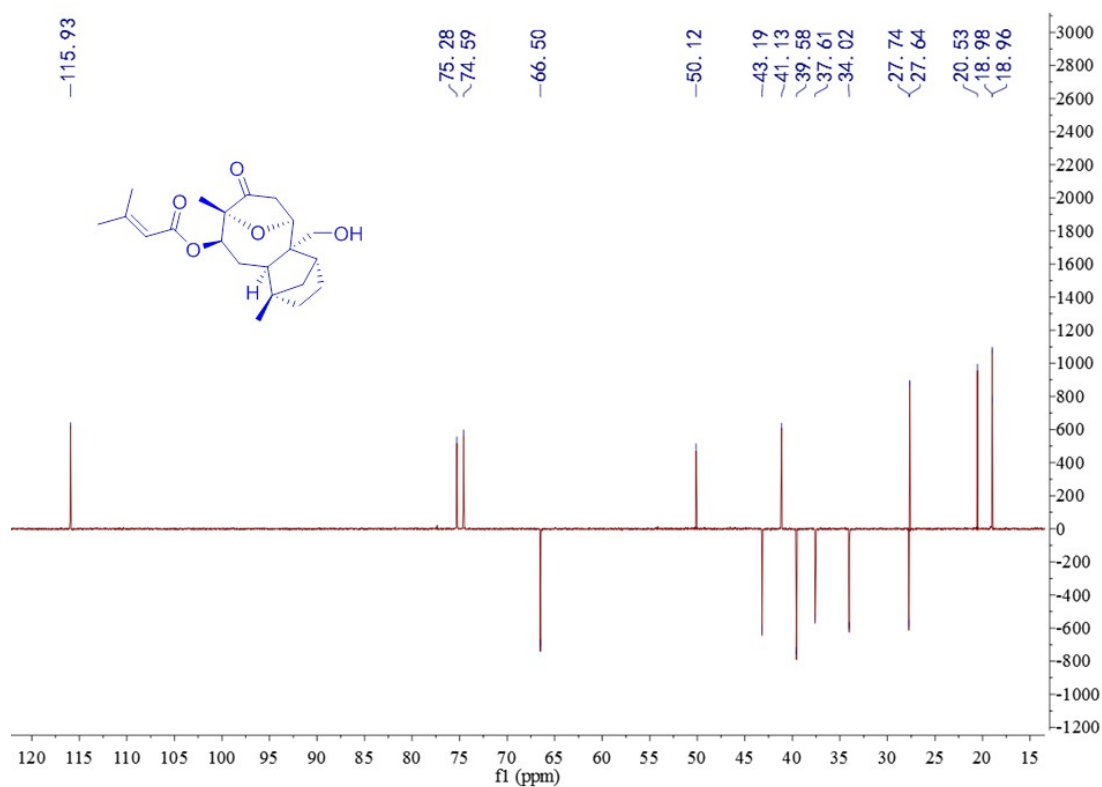

**Figure S50** DEPT spectrum (600 MHz,  $\text{CDCl}_3$ ) of compound **4**.
